# Supplementary material for: DXA reference values of the humanoid sheep model in preclinical studies
Source: PeerJ. 2021 Apr 30;9:e11183. doi: 10.7717/peerj.11183 (PMC8092102; doi:10.7717/peerj.11183)
Supplement: Supplemental Information 3 — Raw data from sheep testing at the laboratory. [file peerj-09-11183-s003.xlsx]

## Sheet: Sheet1
Ohrmarke	No.	Type	Gewicht	1.Messung	Geburtsdatum	Alter (Monate)	Group	Categorie	Bemerkung	Method	Area	Area_code	Time	BMD	BMC	Gewebe(%Fett)	Fett(g)
Ear tag		type	wight	1. Measurement	birth	age (month)	group	category	remarks	method	area	area code	time	BMD	BMC	tissue (%fat)	fat (g)
4	HA3	HA	62	2014-10-02	10/2009	60	2	A+A		DEXA	whole body	1	1st operation	1.118	1851.3	4.7	3023
4	HA3	HA	62	2014-10-02	10/2009	60	2	A+A		DEXA	lumbar vertebrae	2	1st operation	0.985	88.2	4	170
4	HA3	HA	62	2014-10-02	10/2009	60	2	A+A		DEXA	left tibia	3	1st Operation	1.318	83.6	4	21
4	HA3	HA	62	2014-10-02	10/2009	60	2	A+A		DEXA	right tibia	4	1st Operation	1.271	82.4	4	23
4	HA3	HA	62	2014-10-02	10/2009	60	2	A+A		DEXA	left femur	5	1st Operation	1.185	72	4	28
4	HA3	HA	62	2014-10-02	10/2009	60	2	A+A		DEXA	right femur	6	1st Operation	1.147	70	4	31
4	HA3	HA	62	2014-10-02	10/2009	60	2	A+A		DEXA	upper lumber vertebrae	7	1st Operation	1.075	48.4	4	48
4	HA3	HA	62	2014-10-02	10/2009	60	2	A+A		DEXA	left femoral head	8	1st Operation	1.191	6.7	4	3
4	HA3	HA	62	2014-10-02	10/2009	60	2	A+A		DEXA	right femoral head	9	1st Operation	1.174	5.1	4	2
5	Com8	Biocomposit	58	2014-10-13	10/2008	72	1			DEXA	whole body	1	1st operation	1.064	1643.9	4.4	2678
5	Com8	Biocomposit	58	2014-10-13	10/2008	72	1			DEXA	lumbar vertebrae	2	1st operation	0.93	69.7	4	173
5	Com8	Biocomposit	58	2014-10-13	10/2008	72	1			DEXA	left tibia	3	1st Operation	1.069	71.4	4	20
5	Com8	Biocomposit	58	2014-10-13	10/2008	72	1			DEXA	right tibia	4	1st Operation	1.144	71.8	4	20
5	Com8	Biocomposit	58	2014-10-13	10/2008	72	1			DEXA	left femur	5	1st Operation	1.055	59.9	4	25
5	Com8	Biocomposit	58	2014-10-13	10/2008	72	1			DEXA	right femur	6	1st Operation	1.053	63	4	24
5	Com8	Biocomposit	58	2014-10-13	10/2008	72	1			DEXA	upper lumber vertebrae	7	1st Operation	0.988	38.8	4	42
5	Com8	Biocomposit	58	2014-10-13	10/2008	72	1			DEXA	left femoral head	8	1st Operation	1.199	8.6	4	3
5	Com8	Biocomposit	58	2014-10-13	10/2008	72	1			DEXA	right femoral head	9	1st Operation	1.203	6.1	4	2
5	Com8	Biocomposit	58	2015-08-31	10/2008	82	1					1	2015-08-31	1.087	1615.2	7.6	5412
5	Com8	Biocomposit	58	2015-08-31	10/2008	82	1					2	2015-08-31	0.961	75.6	4	177
5	Com8	Biocomposit	58	2015-08-31	10/2008	82	1					3	2015-08-31	1.156	72.4	4	21
5	Com8	Biocomposit	58	2015-08-31	10/2008	82	1					4	2015-08-31	1.019	66.1	6.8	38
5	Com8	Biocomposit	58	2015-08-31	10/2008	82	1					5	2015-08-31	1.146	71.2	4	29
5	Com8	Biocomposit	58	2015-08-31	10/2008	82	1					6	2015-08-31	1.009	57.7	4	28
5	Com8	Biocomposit	58	2015-08-31	10/2008	82	1					7	2015-08-31	1.034	38.6	4	37
5	Com8	Biocomposit	58	2015-08-31	10/2008	82	1					8	2015-08-31	1.315	10.4	4	5
5	Com8	Biocomposit	58	2015-08-31	10/2008	82	1					9	2015-08-31	1.151	5.8	4	3
6	HA6	HA	50	2014-10-07	10/2008	72	2	A+A		DEXA	whole body	1	1st operation	1.007	1527.4	4	2114
6	HA6	HA	50	2014-10-07	10/2008	72	2	A+A		DEXA	lumbar vertebrae	2	1st operation	0.863	74.8	4	166
6	HA6	HA	50	2014-10-07	10/2008	72	2	A+A		DEXA	left tibia	3	1st Operation	1.07	71.2	4	18
6	HA6	HA	50	2014-10-07	10/2008	72	2	A+A		DEXA	right tibia	4	1st Operation	1.084	74.3	4	19
6	HA6	HA	50	2014-10-07	10/2008	72	2	A+A		DEXA	left femur	5	1st Operation	1.015	64.3	4	28
6	HA6	HA	50	2014-10-07	10/2008	72	2	A+A		DEXA	right femur	6	1st Operation	1.025	58.5	4	26
6	HA6	HA	50	2014-10-07	10/2008	72	2	A+A		DEXA	upper lumber vertebrae	7	1st Operation	0.929	37.6	4	41
6	HA6	HA	50	2014-10-07	10/2008	72	2	A+A		DEXA	left femoral head	8	1st Operation	1.14	8.1	4	4
6	HA6	HA	50	2014-10-07	10/2008	72	2	A+A		DEXA	right femoral head	9	1st Operation	1.101	8.3	4	4
6	HA6	HA	50	2015-08-26	10/2008	82	2	A+A				1	2015-08-26	1.231	1873.5	13.6	10046
6	HA6	HA	50	2015-08-26	10/2008	82	2	A+A				2	2015-08-26	1.028	82.1	13	622
6	HA6	HA	50	2015-08-26	10/2008	82	2	A+A				3	2015-08-26	1.305	89.2	4	24
6	HA6	HA	50	2015-08-26	10/2008	82	2	A+A				4	2015-08-26	1.273	83.7	4	25
6	HA6	HA	50	2015-08-26	10/2008	82	2	A+A				5	2015-08-26	1.226	68	4.4	36
6	HA6	HA	50	2015-08-26	10/2008	82	2	A+A				6	2015-08-26	1.192	65.2	4	30
6	HA6	HA	50	2015-08-26	10/2008	82	2	A+A				7	2015-08-26	1.227	48.9	6	61
6	HA6	HA	50	2015-08-26	10/2008	82	2	A+A				8	2015-08-26	1.312	10.4	4	5
6	HA6	HA	50	2015-08-26	10/2008	82	2	A+A				9	2015-08-26	1.12	7.4	4	5
8	Com4	Biocomposit	59	2014-10-06	10/2009	60	1		Schraube dreht sich mit band, Video	DEXA	whole body	1	1st operation	1.197	2083.7	5	3041
8	Com4	Biocomposit	59	2014-10-06	10/2009	60	1		Schraube dreht sich mit band, Video	DEXA	lumbar vertebrae	2	1st operation	1.086	97.8	4	167
8	Com4	Biocomposit	59	2014-10-06	10/2009	60	1		Schraube dreht sich mit band, Video	DEXA	left tibia	3	1st Operation	1.286	88.3	4	21
8	Com4	Biocomposit	59	2014-10-06	10/2009	60	1		Schraube dreht sich mit band, Video	DEXA	right tibia	4	1st Operation	1.287	87.1	4	20
8	Com4	Biocomposit	59	2014-10-06	10/2009	60	1		Schraube dreht sich mit band, Video	DEXA	left femur	5	1st Operation	1.292	83.7	4	32
8	Com4	Biocomposit	59	2014-10-06	10/2009	60	1		Schraube dreht sich mit band, Video	DEXA	right femur	6	1st Operation	1.241	83.1	4	30
8	Com4	Biocomposit	59	2014-10-06	10/2009	60	1		Schraube dreht sich mit band, Video	DEXA	upper lumber vertebrae	7	1st Operation	1.214	57.2	4	43
8	Com4	Biocomposit	59	2014-10-06	10/2009	60	1		Schraube dreht sich mit band, Video	DEXA	left femoral head	8	1st Operation	1.587	9.4	4	4
8	Com4	Biocomposit	59	2014-10-06	10/2009	60	1		Schraube dreht sich mit band, Video	DEXA	right femoral head	9	1st Operation	1.778	10.3	4	3
8	Com4	Biocomposit	59	2015-09-02	10/2009	71	1		Schraube dreht sich mit band, Video			1	2015-09-02	1.152	2069.2	6.2	4335
8	Com4	Biocomposit	59	2015-09-02	10/2009	71	1		Schraube dreht sich mit band, Video			2	2015-09-02	1.108	94.9	5	218
8	Com4	Biocomposit	59	2015-09-02	10/2009	71	1		Schraube dreht sich mit band, Video			3	2015-09-02	1.233	85.1	4	23
8	Com4	Biocomposit	59	2015-09-02	10/2009	71	1		Schraube dreht sich mit band, Video			4	2015-09-02	1.17	80.7	4	23
8	Com4	Biocomposit	59	2015-09-02	10/2009	71	1		Schraube dreht sich mit band, Video			5	2015-09-02	1.129	74.6	4	38
8	Com4	Biocomposit	59	2015-09-02	10/2009	71	1		Schraube dreht sich mit band, Video			6	2015-09-02	1.134	75	4	34
8	Com4	Biocomposit	59	2015-09-02	10/2009	71	1		Schraube dreht sich mit band, Video			7	2015-09-02	1.35	60.3	4	46
8	Com4	Biocomposit	59	2015-09-02	10/2009	71	1		Schraube dreht sich mit band, Video			8	2015-09-02	1.33	10.9	4	6
8	Com4	Biocomposit	59	2015-09-02	10/2009	71	1		Schraube dreht sich mit band, Video			9	2015-09-02	1.119	9	4	5
11	HA7	HA	56	2014-10-09	10/2008	72	2	A+A		DEXA	whole body	1	1st operation	1.062	1778.5	4.1	2375
11	HA7	HA	56	2014-10-09	10/2008	72	2	A+A		DEXA	lumbar vertebrae	2	1st operation	0.992	81.3	4	168
11	HA7	HA	56	2014-10-09	10/2008	72	2	A+A		DEXA	left tibia	3	1st Operation	1.159	70.8	4	18
11	HA7	HA	56	2014-10-09	10/2008	72	2	A+A		DEXA	right tibia	4	1st Operation	1.138	69	4	20
11	HA7	HA	56	2014-10-09	10/2008	72	2	A+A		DEXA	left femur	5	1st Operation	1.073	58.3	4	25
11	HA7	HA	56	2014-10-09	10/2008	72	2	A+A		DEXA	right femur	6	1st Operation	1.011	61.7	4	28
11	HA7	HA	56	2014-10-09	10/2008	72	2	A+A		DEXA	upper lumber vertebrae	7	1st Operation	1.061	43.4	4	46
11	HA7	HA	56	2014-10-09	10/2008	72	2	A+A		DEXA	left femoral head	8	1st Operation	1.242	7.5	4	3
11	HA7	HA	56	2014-10-09	10/2008	72	2	A+A		DEXA	right femoral head	9	1st Operation	1.269	8.1	4	3
11	HA7	HA	56	2015-08-27	10/2008	82	2	A+A				1	2015-08-27	1.168	1942.8	8.5	5393
11	HA7	HA	56	2015-08-27	10/2008	82	2	A+A				2	2015-08-27	1.174	104	5.4	233
11	HA7	HA	56	2015-08-27	10/2008	82	2	A+A				3	2015-08-27	1.227	76.8	4	22
11	HA7	HA	56	2015-08-27	10/2008	82	2	A+A				4	2015-08-27	1.191	74	4	22
11	HA7	HA	56	2015-08-27	10/2008	82	2	A+A				5	2015-08-27	1.231	62.7	4	25
11	HA7	HA	56	2015-08-27	10/2008	82	2	A+A				6	2015-08-27	1.176	63.8	4	25
11	HA7	HA	56	2015-08-27	10/2008	82	2	A+A				7	2015-08-27	1.49	64.2	4.3	43
11	HA7	HA	56	2015-08-27	10/2008	82	2	A+A				8	2015-08-27	1.579	9.9	6.7	6
11	HA7	HA	56	2015-08-27	10/2008	82	2	A+A				9	2015-08-27	1.381	9	4	3
32	Com2	Biocomposit	63	2014-09-29	10/2008	72	1			DEXA	whole body	1	1st operation	1.037	1671.9	5	3217
32	Com2	Biocomposit	63	2014-09-29	10/2008	72	1			DEXA	lumbar vertebrae	2	1st operation	0.935	75.8	4	188
32	Com2	Biocomposit	63	2014-09-29	10/2008	72	1			DEXA	left tibia	3	1st Operation	1.054	68.2	4	22
32	Com2	Biocomposit	63	2014-09-29	10/2008	72	1			DEXA	right tibia	4	1st Operation	1.033	68.9	4	22
32	Com2	Biocomposit	63	2014-09-29	10/2008	72	1			DEXA	left femur	5	1st Operation	1.055	55.9	4	25
32	Com2	Biocomposit	63	2014-09-29	10/2008	72	1			DEXA	right femur	6	1st Operation	1.045	55.3	4	28
32	Com2	Biocomposit	63	2014-09-29	10/2008	72	1			DEXA	upper lumber vertebrae	7	1st Operation	1.023	34.8	4	42
32	Com2	Biocomposit	63	2014-09-29	10/2008	72	1			DEXA	left femoral head	8	1st Operation	1.435	11	4	8
32	Com2	Biocomposit	63	2014-09-29	10/2008	72	1			DEXA	right femoral head	9	1st Operation	1.197	8.9	4	7
32	Com2	Biocomposit	63	2015-08-24	10/2008	82	1					1	2015-08-24	1.123	1851.5	10.2	8131
32	Com2	Biocomposit	63	2015-08-24	10/2008	82	1					2	2015-08-24	1.043	78.6	6.5	302
32	Com2	Biocomposit	63	2015-08-24	10/2008	82	1					3	2015-08-24	1.167	80.3	4	30
32	Com2	Biocomposit	63	2015-08-24	10/2008	82	1					4	2015-08-24	1.12	74	4.3	28
32	Com2	Biocomposit	63	2015-08-24	10/2008	82	1					5	2015-08-24	1.103	66.3	4	42
32	Com2	Biocomposit	63	2015-08-24	10/2008	82	1					6	2015-08-24	1.011	59.9	4	33
32	Com2	Biocomposit	63	2015-08-24	10/2008	82	1					7	2015-08-24	1.192	42.4	4	35
32	Com2	Biocomposit	63	2015-08-24	10/2008	82	1					8	2015-08-24	1.042	10.3	4	8
32	Com2	Biocomposit	63	2015-08-24	10/2008	82	1					9	2015-08-24	1.168	7.8	4	5
97	HA4	HA	65	2014-10-06	10/2008	72	2	A+A		DEXA	whole body	1	1st operation	1.132	1916.8	4.9	3274
97	HA4	HA	65	2014-10-06	10/2008	72	2	A+A		DEXA	lumbar vertebrae	2	1st operation	0.959	81.6	4	167
97	HA4	HA	65	2014-10-06	10/2008	72	2	A+A		DEXA	left tibia	3	1st Operation	1.273	81.5	4	19
97	HA4	HA	65	2014-10-06	10/2008	72	2	A+A		DEXA	right tibia	4	1st Operation	1.224	79.9	4	19
97	HA4	HA	65	2014-10-06	10/2008	72	2	A+A		DEXA	left femur	5	1st Operation	1.124	75.7	4	31
97	HA4	HA	65	2014-10-06	10/2008	72	2	A+A		DEXA	right femur	6	1st Operation	1.11	70.9	4	34
97	HA4	HA	65	2014-10-06	10/2008	72	2	A+A		DEXA	upper lumber vertebrae	7	1st Operation	1.085	46.5	4	46
97	HA4	HA	65	2014-10-06	10/2008	72	2	A+A		DEXA	left femoral head	8	1st Operation	1.128	10.1	4	4
97	HA4	HA	65	2014-10-06	10/2008	72	2	A+A		DEXA	right femoral head	9	1st Operation	1.211	7.3	4	3
97	HA4	HA	65	2015-08-26	10/2008	82	2	A+A				1	2015-08-26	1.184	2042.1	10.5	7971
97	HA4	HA	65	2015-08-26	10/2008	82	2	A+A				2	2015-08-26	1.05	91.8	7	315
97	HA4	HA	65	2015-08-26	10/2008	82	2	A+A				3	2015-08-26	1.266	83.1	4	23
97	HA4	HA	65	2015-08-26	10/2008	82	2	A+A				4	2015-08-26	1.241	84.2	4	23
97	HA4	HA	65	2015-08-26	10/2008	82	2	A+A				5	2015-08-26	1.271	79.1	4	33
97	HA4	HA	65	2015-08-26	10/2008	82	2	A+A				6	2015-08-26	1.163	74	4	31
97	HA4	HA	65	2015-08-26	10/2008	82	2	A+A				7	2015-08-26	1.279	37.4	4	29
97	HA4	HA	65	2015-08-26	10/2008	82	2	A+A				8	2015-08-26	1.323	15	4	7
97	HA4	HA	65	2015-08-26	10/2008	82	2	A+A				9	2015-08-26	1.18	10.3	4	5
7370	Com3	Biocomposit	72	2014-10-02	9/2007	85	1			DEXA	whole body	1	1st operation	1.066	1591.1	13.2	10010
7370	Com3	Biocomposit	72	2014-10-02	9/2007	85	1			DEXA	lumbar vertebrae	2	1st operation	0.874	78.4	7.2	323
7370	Com3	Biocomposit	72	2014-10-02	9/2007	85	1			DEXA	left tibia	3	1st Operation	1.067	68.9	7.6	52
7370	Com3	Biocomposit	72	2014-10-02	9/2007	85	1			DEXA	right tibia	4	1st Operation	1.023	70.4	4.3	31
7370	Com3	Biocomposit	72	2014-10-02	9/2007	85	1			DEXA	left femur	5	1st Operation	0.966	56.7	4.8	39
7370	Com3	Biocomposit	72	2014-10-02	9/2007	85	1			DEXA	right femur	6	1st Operation	0.945	55.1	4.3	39
7370	Com3	Biocomposit	72	2014-10-02	9/2007	85	1			DEXA	upper lumber vertebrae	7	1st Operation	0.966	42.1	5.8	67
7370	Com3	Biocomposit	72	2014-10-02	9/2007	85	1			DEXA	left femoral head	8	1st Operation	1.175	9.3	4.3	6
7370	Com3	Biocomposit	72	2014-10-02	9/2007	85	1			DEXA	right femoral head	9	1st Operation	0.999	7.4	4	5
7370	Com3	Biocomposit	72	2015-08-25	9/2007	95	1					1	2015-08-25	1.006	1676.8	4.3	3.167
7370	Com3	Biocomposit	72	2015-08-25	9/2007	95	1					2	2015-08-25	0.87	68.5	4	165
7370	Com3	Biocomposit	72	2015-08-25	9/2007	95	1					3	2015-08-25	1.015	65.9	4	24
7370	Com3	Biocomposit	72	2015-08-25	9/2007	95	1					4	2015-08-25	0.981	61.7	4	25
7370	Com3	Biocomposit	72	2015-08-25	9/2007	95	1					5	2015-08-25	0.979	48	4	28
7370	Com3	Biocomposit	72	2015-08-25	9/2007	95	1					6	2015-08-25	0.923	48.2	4	30
7370	Com3	Biocomposit	72	2015-08-25	9/2007	95	1					7	2015-08-25	0.92	32.4	4	33
7370	Com3	Biocomposit	72	2015-08-25	9/2007	95	1					8	2015-08-25	1.132	8.6	4	5
7370	Com3	Biocomposit	72	2015-08-25	9/2007	95	1					9	2015-08-25	0.99	8.5	4	7
7403	HA2	HA	62	2014-10-02	9/2007	85	2	A+A		DEXA	whole body	1	1st operation	1.147	1930.4	5.7	3640
7403	HA2	HA	62	2014-10-02	9/2007	85	2	A+A		DEXA	lumbar vertebrae	2	1st operation	1.091	96.9	4.2	188
7403	HA2	HA	62	2014-10-02	9/2007	85	2	A+A		DEXA	left tibia	3	1st Operation	1.244	77.3	4	22
7403	HA2	HA	62	2014-10-02	9/2007	85	2	A+A		DEXA	right tibia	4	1st Operation	1.166	76.1	4	21
7403	HA2	HA	62	2014-10-02	9/2007	85	2	A+A		DEXA	left femur	5	1st Operation	1.205	71	4	31
7403	HA2	HA	62	2014-10-02	9/2007	85	2	A+A		DEXA	right femur	6	1st Operation	1.178	71.4	4	34
7403	HA2	HA	62	2014-10-02	9/2007	85	2	A+A		DEXA	upper lumber vertebrae	7	1st Operation	1.283	58.6	4.1	47
7403	HA2	HA	62	2014-10-02	9/2007	85	2	A+A		DEXA	left femoral head	8	1st Operation	1.476	11.4	4	5
7403	HA2	HA	62	2014-10-02	9/2007	85	2	A+A		DEXA	right femoral head	9	1st Operation	1.593	10.3	4	4
7403	HA2	HA	62	2015-08-25	9/2007	95	2	A+A				1	2015-08-25	1.132	1821.6	5	3252
7403	HA2	HA	62	2015-08-25	9/2007	95	2	A+A				2	2015-08-25	1.022	87.1	4	180
7403	HA2	HA	62	2015-08-25	9/2007	95	2	A+A				3	2015-08-25	1.164	75.3	4	23
7403	HA2	HA	62	2015-08-25	9/2007	95	2	A+A				4	2015-08-25	1.129	71.9	4	23
7403	HA2	HA	62	2015-08-25	9/2007	95	2	A+A				5	2015-08-25	1.267	58.8	4	22
7403	HA2	HA	62	2015-08-25	9/2007	95	2	A+A				6	2015-08-25	1.086	58.5	4	27
7403	HA2	HA	62	2015-08-25	9/2007	95	2	A+A				7	2015-08-25	1.124	50.7	4	44
7403	HA2	HA	62	2015-08-25	9/2007	95	2	A+A				8	2015-08-25	1.483	10.1	4	4
7403	HA2	HA	62	2015-08-25	9/2007	95	2	A+A				9	2015-08-25	1.249	8.7	%	%
40059	HA9	HA	62	2014-10-10	2010-10-01	48	2	A+A		DEXA	whole body	1	1st operation	1.145	2044.3	4.8	3199
40059	HA9	HA	62	2014-10-10	2010-10-01	48	2	A+A		DEXA	lumbar vertebrae	2	1st operation	1.19	105.9	4	183
40059	HA9	HA	62	2014-10-10	2010-10-01	48	2	A+A		DEXA	left tibia	3	1st Operation	1.393	92.5	4	24
40059	HA9	HA	62	2014-10-10	2010-10-01	48	2	A+A		DEXA	right tibia	4	1st Operation	1.324	91	4	25
40059	HA9	HA	62	2014-10-10	2010-10-01	48	2	A+A		DEXA	left femur	5	1st Operation	1.233	90.4	4	39
40059	HA9	HA	62	2014-10-10	2010-10-01	48	2	A+A		DEXA	right femur	6	1st Operation	1.186	65.4	4	27
40059	HA9	HA	62	2014-10-10	2010-10-01	48	2	A+A		DEXA	upper lumber vertebrae	7	1st Operation	1.301	58.4	4.9	59
40059	HA9	HA	62	2014-10-10	2010-10-01	48	2	A+A		DEXA	left femoral head	8	1st Operation	1.204	11.9	4	5
40059	HA9	HA	62	2014-10-10	2010-10-01	48	2	A+A		DEXA	right femoral head	9	1st Operation	1.227	10.2	4	5
40059	HA9	HA	62	2015-08-27	2010-10-01	58	2	A+A				1	2015-08-27	1.228	2205.4	9.2	7201
40059	HA9	HA	62	2015-08-27	2010-10-01	58	2	A+A				2	2015-08-27	1.151	101.5	7.8	355
40059	HA9	HA	62	2015-08-27	2010-10-01	58	2	A+A				3	2015-08-27	1.324	96.1	4	30
40059	HA9	HA	62	2015-08-27	2010-10-01	58	2	A+A				4	2015-08-27	1.252	88.8	4	32
40059	HA9	HA	62	2015-08-27	2010-10-01	58	2	A+A				5	2015-08-27	1.447	76.7	4	30
40059	HA9	HA	62	2015-08-27	2010-10-01	58	2	A+A				6	2015-08-27	1.271	73.8	4	32
40059	HA9	HA	62	2015-08-27	2010-10-01	58	2	A+A				7	2015-08-27	1.367	61.8	7.7	85
40059	HA9	HA	62	2015-08-27	2010-10-01	58	2	A+A				8	2015-08-27	1.643	12.9	4	5
40059	HA9	HA	62	2015-08-27	2010-10-01	58	2	A+A				9	2015-08-27	1.03	8.9	6.1	9
40088	Com10	Biocomposit	53	2014-10-15	10/2008	72	1			DEXA	whole body	1	1st operation	1.125	1752.4	4.6	2485
40088	Com10	Biocomposit	53	2014-10-15	10/2008	72	1			DEXA	lumbar vertebrae	2	1st operation	1.037	85.1	4	160
40088	Com10	Biocomposit	53	2014-10-15	10/2008	72	1			DEXA	left tibia	3	1st Operation	1.216	75.6	4	19
40088	Com10	Biocomposit	53	2014-10-15	10/2008	72	1			DEXA	right tibia	4	1st Operation	1.267	76.7	4	20
40088	Com10	Biocomposit	53	2014-10-15	10/2008	72	1			DEXA	left femur	5	1st Operation	1.142	60.4	4	24
40088	Com10	Biocomposit	53	2014-10-15	10/2008	72	1			DEXA	right femur	6	1st Operation	1.217	65.2	4	27
40088	Com10	Biocomposit	53	2014-10-15	10/2008	72	1			DEXA	upper lumber vertebrae	7	1st Operation	1.086	52.7	4	47
40088	Com10	Biocomposit	53	2014-10-15	10/2008	72	1			DEXA	left femoral head	8	1st Operation	2.002	10.6	4	4
40088	Com10	Biocomposit	53	2014-10-15	10/2008	72	1			DEXA	right femoral head	9	1st Operation	2.085	9.1	%	%
40088	Com10	Biocomposit	53	2015-09-01	10/2008	83	1					1	2015-09-01	1.284	1930.2	14.8	11477
40088	Com10	Biocomposit	53	2015-09-01	10/2008	83	1					2	2015-09-01	1.252	103.5	9.7	451
40088	Com10	Biocomposit	53	2015-09-01	10/2008	83	1					3	2015-09-01	1.435	91.1	4	27
40088	Com10	Biocomposit	53	2015-09-01	10/2008	83	1					4	2015-09-01	1.312	82.6	5.1	30
40088	Com10	Biocomposit	53	2015-09-01	10/2008	83	1					5	2015-09-01	1.333	64.2	4	27
40088	Com10	Biocomposit	53	2015-09-01	10/2008	83	1					6	2015-09-01	1.16	70.7	4	33
40088	Com10	Biocomposit	53	2015-09-01	10/2008	83	1					7	2015-09-01	1.426	62.3	5.3	56
40088	Com10	Biocomposit	53	2015-09-01	10/2008	83	1					8	2015-09-01	1.373	8.5	4	5
40088	Com10	Biocomposit	53	2015-09-01	10/2008	83	1					9	2015-09-01	1.186	7.2	4	4
55606	HA1	HA	69,5	2014-09-29	9/2010	48	2	A+A	Femora Schraube gebrochen am kopf, Tibia heile	DEXA	whole body	1	1st operation	1.22	1895.4	11.3	7984
55606	HA1	HA	69,5	2014-09-29	9/2010	48	2	A+A	Femora Schraube gebrochen am kopf, Tibia heile	DEXA	lumbar vertebrae	2	1st operation	1.055	88.7	6.1	270
55606	HA1	HA	69,5	2014-09-29	9/2010	48	2	A+A	Femora Schraube gebrochen am kopf, Tibia heile	DEXA	left tibia	3	1st Operation	1.334	83.3	4.8	27
55606	HA1	HA	69,5	2014-09-29	9/2010	48	2	A+A	Femora Schraube gebrochen am kopf, Tibia heile	DEXA	right tibia	4	1st Operation	1.314	83.9	4	24
55606	HA1	HA	69,5	2014-09-29	9/2010	48	2	A+A	Femora Schraube gebrochen am kopf, Tibia heile	DEXA	left femur	5	1st Operation	1.246	82.8	4.2	41
55606	HA1	HA	69,5	2014-09-29	9/2010	48	2	A+A	Femora Schraube gebrochen am kopf, Tibia heile	DEXA	right femur	6	1st Operation	1.242	78	4	36
55606	HA1	HA	69,5	2014-09-29	9/2010	48	2	A+A	Femora Schraube gebrochen am kopf, Tibia heile	DEXA	upper lumber vertebrae	7	1st Operation	1.274	48.9	7.3	66
55606	HA1	HA	69,5	2014-09-29	9/2010	48	2	A+A	Femora Schraube gebrochen am kopf, Tibia heile	DEXA	left femoral head	8	1st Operation	1.211	8.1	6	7
55606	HA1	HA	69,5	2014-09-29	9/2010	48	2	A+A	Femora Schraube gebrochen am kopf, Tibia heile	DEXA	right femoral head	9	1st Operation	1.128	6.9	4	3
55606	HA1	HA	69,5	2015-08-24	9/2010	59	2	A+A	Femora Schraube gebrochen am kopf, Tibia heile			1	2015-08-24	1.204	1834.1	13.8	10635
55606	HA1	HA	69,5	2015-08-24	9/2010	59	2	A+A	Femora Schraube gebrochen am kopf, Tibia heile			2	2015-08-24	1.081	81.8	8.8	416
55606	HA1	HA	69,5	2015-08-24	9/2010	59	2	A+A	Femora Schraube gebrochen am kopf, Tibia heile			3	2015-08-24	1.305	84.6	4.5	28
55606	HA1	HA	69,5	2015-08-24	9/2010	59	2	A+A	Femora Schraube gebrochen am kopf, Tibia heile			4	2015-08-24	1.096	69	6.2	44
55606	HA1	HA	69,5	2015-08-24	9/2010	59	2	A+A	Femora Schraube gebrochen am kopf, Tibia heile			5	2015-08-24	1.062	67.2	4.1	39
55606	HA1	HA	69,5	2015-08-24	9/2010	59	2	A+A	Femora Schraube gebrochen am kopf, Tibia heile			6	2015-08-24	1.027	60.3	4.2	41
55606	HA1	HA	69,5	2015-08-24	9/2010	59	2	A+A	Femora Schraube gebrochen am kopf, Tibia heile			7	2015-08-24	1.217	49.7	20	211
55606	HA1	HA	69,5	2015-08-24	9/2010	59	2	A+A	Femora Schraube gebrochen am kopf, Tibia heile			8	2015-08-24	0.97	11.2	14.6	30
55606	HA1	HA	69,5	2015-08-24	9/2010	59	2	A+A	Femora Schraube gebrochen am kopf, Tibia heile			9	2015-08-24	0.79	9.8	4	10
81250.HA5	HA5	HA	51	2014-10-07	9/2007	85	2	A+A		DEXA	whole body	1	1st operation	0.981	1561.3	4	2104
81250.HA5	HA5	HA	51	2014-10-07	9/2007	85	2	A+A		DEXA	lumbar vertebrae	2	1st operation	0.911	77.2	4	149
81250.HA5	HA5	HA	51	2014-10-07	9/2007	85	2	A+A		DEXA	left tibia	3	1st Operation	1.169	75.3	4	18
81250.HA5	HA5	HA	51	2014-10-07	9/2007	85	2	A+A		DEXA	right tibia	4	1st Operation	1.133	75.9	4	18
81250.HA5	HA5	HA	51	2014-10-07	9/2007	85	2	A+A		DEXA	left femur	5	1st Operation	1.089	64.4	4	25
81250.HA5	HA5	HA	51	2014-10-07	9/2007	85	2	A+A		DEXA	right femur	6	1st Operation	1.043	57.4	4	21
81250.HA5	HA5	HA	51	2014-10-07	9/2007	85	2	A+A		DEXA	upper lumber vertebrae	7	1st Operation	0.968	42.8	4	40
81250.HA5	HA5	HA	51	2014-10-07	9/2007	85	2	A+A		DEXA	left femoral head	8	1st Operation	1.035	9.9	4	4
81250.HA5	HA5	HA	51	2014-10-07	9/2007	85	2	A+A		DEXA	right femoral head	9	1st Operation	1.179	9.7	4	4
81250.HA5	HA5	HA	51	2015-08-26	9/2007	95	2	A+A				1	2015-08-26	1.16	1916.9	13.9	10060
81250.HA5	HA5	HA	51	2015-08-26	9/2007	95	2	A+A				2	2015-08-26	1.151	111.1	6.7	305
81250.HA5	HA5	HA	51	2015-08-26	9/2007	95	2	A+A				3	2015-08-26	1.334	86.6	4	22
81250.HA5	HA5	HA	51	2015-08-26	9/2007	95	2	A+A				4	2015-08-26	1.295	83.2	4	25
81250.HA5	HA5	HA	51	2015-08-26	9/2007	95	2	A+A				5	2015-08-26	1.388	73.7	4	29
81250.HA5	HA5	HA	51	2015-08-26	9/2007	95	2	A+A				6	2015-08-26	1.148	62.8	4	31
81250.HA5	HA5	HA	51	2015-08-26	9/2007	95	2	A+A				7	2015-08-26	1.44	61.1	9.4	98
81250.HA5	HA5	HA	51	2015-08-26	9/2007	95	2	A+A				8	2015-08-26	1.419	12.5	4	6
81250.HA5	HA5	HA	51	2015-08-26	9/2007	95	2	A+A				9	2015-08-26	1.135	8.7	10.2	16
81250	HA11	HA	60	2014-10-14	2007-09-01	85	2	A+A	982000142485913	DEXA	whole body	1	1st operation	1.046	1633.4	4.4	2751
81250	HA11	HA	60	2014-10-14	2007-09-01	85	2	A+A	982000142485913	DEXA	lumbar vertebrae	2	1st operation	0.971	90.5	4	184
81250	HA11	HA	60	2014-10-14	2007-09-01	85	2	A+A	982000142485913	DEXA	left tibia	3	1st Operation	1.144	70.6	4	19
81250	HA11	HA	60	2014-10-14	2007-09-01	85	2	A+A	982000142485913	DEXA	right tibia	4	1st Operation	1.106	70.8	4	19
81250	HA11	HA	60	2014-10-14	2007-09-01	85	2	A+A	982000142485913	DEXA	left femur	5	1st Operation	0.979	51.1	4	25
81250	HA11	HA	60	2014-10-14	2007-09-01	85	2	A+A	982000142485913	DEXA	right femur	6	1st Operation	1.05	59.8	4	31
81250	HA11	HA	60	2014-10-14	2007-09-01	85	2	A+A	982000142485913	DEXA	upper lumber vertebrae	7	1st Operation	1.069	40.8	4	45
81250	HA11	HA	60	2014-10-14	2007-09-01	85	2	A+A	982000142485913	DEXA	left femoral head	8	1st Operation	0.904	5.3	4	4
81250	HA11	HA	60	2014-10-14	2007-09-01	85	2	A+A	982000142485913	DEXA	right femoral head	9	1st Operation	1.133	6.5	4	4
81250	HA11	HA	60	2015-08-28	2007-09-01	95	2	A+A	982000142485913			1	2015-08-28	1.19	1932.1	10.2	7199
81250	HA11	HA	60	2015-08-28	2007-09-01	95	2	A+A	982000142485913			2	2015-08-28	1.228	105.9	5.4	251
81250	HA11	HA	60	2015-08-28	2007-09-01	95	2	A+A	982000142485913			3	2015-08-28	1.241	80.8	4	28
81250	HA11	HA	60	2015-08-28	2007-09-01	95	2	A+A	982000142485913			4	2015-08-28	1.273	77.4	4	28
81250	HA11	HA	60	2015-08-28	2007-09-01	95	2	A+A	982000142485913			5	2015-08-28	1.064	57.2	4	33
81250	HA11	HA	60	2015-08-28	2007-09-01	95	2	A+A	982000142485913			6	2015-08-28	1.072	57.8	4	36
81250	HA11	HA	60	2015-08-28	2007-09-01	95	2	A+A	982000142485913			7	2015-08-28	1.441	62.6	4.5	48
81250	HA11	HA	60	2015-08-28	2007-09-01	95	2	A+A	982000142485913			8	2015-08-28	1.232	9.6	%	%
81250	HA11	HA	60	2015-08-28	2007-09-01	95	2	A+A	982000142485913			9	2015-08-28	1.076	9.3	4	7
87221	Com14	Biocomposit	80	2014-10-27	2011-10-01	36	1			DEXA	whole body	1	1st operation	1.212	1802.1	17.4	14322
87221	Com14	Biocomposit	80	2014-10-27	2011-10-01	36	1			DEXA	lumbar vertebrae	2	1st operation	0.979	73	17.2	873
87221	Com14	Biocomposit	80	2014-10-27	2011-10-01	36	1			DEXA	left tibia	3	1st Operation	1.271	82.4	4	27
87221	Com14	Biocomposit	80	2014-10-27	2011-10-01	36	1			DEXA	right tibia	4	1st Operation	1.279	83	4	29
87221	Com14	Biocomposit	80	2014-10-27	2011-10-01	36	1			DEXA	left femur	5	1st Operation	1.413	68.8	4	33
87221	Com14	Biocomposit	80	2014-10-27	2011-10-01	36	1			DEXA	right femur	6	1st Operation	1.528	57.5	4.1	27
87221	Com14	Biocomposit	80	2014-10-27	2011-10-01	36	1			DEXA	upper lumber vertebrae	7	1st Operation	1.03	36.3	12.7	153
87221	Com14	Biocomposit	80	2014-10-27	2011-10-01	36	1			DEXA	left femoral head	8	1st Operation	1.709	8.7	14.2	15
87221	Com14	Biocomposit	80	2014-10-27	2011-10-01	36	1			DEXA	right femoral head	9	1st Operation	1.687	11	4.8	8
87221	Com14	Biocomposit	80	2015-09-02	2011-10-01	47	1					1	2015-09-02	1.168	1662.1	18	14445
87221	Com14	Biocomposit	80	2015-09-02	2011-10-01	47	1					2	2015-09-02	0.97	72.5	19.6	952
87221	Com14	Biocomposit	80	2015-09-02	2011-10-01	47	1					3	2015-09-02	1.302	85.8	4	26
87221	Com14	Biocomposit	80	2015-09-02	2011-10-01	47	1					4	2015-09-02	1.196	78.1	6.4	47
87221	Com14	Biocomposit	80	2015-09-02	2011-10-01	47	1					5	2015-09-02	1.255	66.3	4.7	40
87221	Com14	Biocomposit	80	2015-09-02	2011-10-01	47	1					6	2015-09-02	1.195	63.8	4.9	44
87221	Com14	Biocomposit	80	2015-09-02	2011-10-01	47	1					7	2015-09-02	1.175	50.2	10.7	128
87221	Com14	Biocomposit	80	2015-09-02	2011-10-01	47	1					8	2015-09-02	1.518	10	4.7	6
87221	Com14	Biocomposit	80	2015-09-02	2011-10-01	47	1					9	2015-09-02	1.068	9.6	13.8	26
92486	Com7	Biocomposit	60	2014-10-13	8/2009	62	1			DEXA	whole body	1	1st operation	1.118	1909.2	5.1	3164
92486	Com7	Biocomposit	60	2014-10-13	8/2009	62	1			DEXA	lumbar vertebrae	2	1st operation	1.09	95	4	170
92486	Com7	Biocomposit	60	2014-10-13	8/2009	62	1			DEXA	left tibia	3	1st Operation	1.171	76.3	4	26
92486	Com7	Biocomposit	60	2014-10-13	8/2009	62	1			DEXA	right tibia	4	1st Operation	1.268	68.6	4	31
92486	Com7	Biocomposit	60	2014-10-13	8/2009	62	1			DEXA	left femur	5	1st Operation	1.186	76.8	4	41
92486	Com7	Biocomposit	60	2014-10-13	8/2009	62	1			DEXA	right femur	6	1st Operation	1.153	69.4	4	36
92486	Com7	Biocomposit	60	2014-10-13	8/2009	62	1			DEXA	upper lumber vertebrae	7	1st Operation	1.273	48.2	4	36
92486	Com7	Biocomposit	60	2014-10-13	8/2009	62	1			DEXA	left femoral head	8	1st Operation	1.338	13.2	4	8
92486	Com7	Biocomposit	60	2014-10-13	8/2009	62	1			DEXA	right femoral head	9	1st Operation	1.107	9.7	4	7
92486	Com7	Biocomposit	60	2015-08-28	8/2009	72	1					1	2015-08-28	1.243	2098.8	13.7	10218
92486	Com7	Biocomposit	60	2015-08-28	8/2009	72	1					2	2015-08-28	1.27	106.7	9	410
92486	Com7	Biocomposit	60	2015-08-28	8/2009	72	1					3	2015-08-28	1.316	92.2	4	25
92486	Com7	Biocomposit	60	2015-08-28	8/2009	72	1					4	2015-08-28	1.237	78.1	4.2	22
92486	Com7	Biocomposit	60	2015-08-28	8/2009	72	1					5	2015-08-28	1.237	73.8	4	38
92486	Com7	Biocomposit	60	2015-08-28	8/2009	72	1					6	2015-08-28	1.266	78.2	4	33
92486	Com7	Biocomposit	60	2015-08-28	8/2009	72	1					7	2015-08-28	1.466	62.2	6.2	65
92486	Com7	Biocomposit	60	2015-08-28	8/2009	72	1					8	2015-08-28	1.615	12	4.8	6
92486	Com7	Biocomposit	60	2015-08-28	8/2009	72	1					9	2015-08-28	1.532	9	4	4
92502	Com6	Biocomposit	62	2014-10-13	8/2009	62	1			DEXA	whole body	1	1st operation	1.047	1804.4	4.4	2812
92502	Com6	Biocomposit	62	2014-10-13	8/2009	62	1			DEXA	lumbar vertebrae	2	1st operation	0.97	81.4	4	168
92502	Com6	Biocomposit	62	2014-10-13	8/2009	62	1			DEXA	left tibia	3	1st Operation	1.084	70.6	4	20
92502	Com6	Biocomposit	62	2014-10-13	8/2009	62	1			DEXA	right tibia	4	1st Operation	1.115	73.6	4	19
92502	Com6	Biocomposit	62	2014-10-13	8/2009	62	1			DEXA	left femur	5	1st Operation	0.976	67.6	4	29
92502	Com6	Biocomposit	62	2014-10-13	8/2009	62	1			DEXA	right femur	6	1st Operation	1.007	64.7	4	28
92502	Com6	Biocomposit	62	2014-10-13	8/2009	62	1			DEXA	upper lumber vertebrae	7	1st Operation	1.096	43.9	4	40
92502	Com6	Biocomposit	62	2014-10-13	8/2009	62	1			DEXA	left femoral head	8	1st Operation	1.289	7.3	4	3
92502	Com6	Biocomposit	62	2014-10-13	8/2009	62	1			DEXA	right femoral head	9	1st Operation	1.012	6.5	4	3
92502	Com6	Biocomposit	62	2015-08-27	8/2009	72	1					1	2015-08-27	1.185	2050	14.7	11661
92502	Com6	Biocomposit	62	2015-08-27	8/2009	72	1					2	2015-08-27	1.142	84.9	16.3	765
92502	Com6	Biocomposit	62	2015-08-27	8/2009	72	1					3	2015-08-27	1.203	85	4	23
92502	Com6	Biocomposit	62	2015-08-27	8/2009	72	1					4	2015-08-27	1.072	71.9	4.1	24
92502	Com6	Biocomposit	62	2015-08-27	8/2009	72	1					5	2015-08-27	1.096	65.4	4	28
92502	Com6	Biocomposit	62	2015-08-27	8/2009	72	1					6	2015-08-27	1.014	59.7	4	27
92502	Com6	Biocomposit	62	2015-08-27	8/2009	72	1					7	2015-08-27	1.267	47.4	11.2	101
92502	Com6	Biocomposit	62	2015-08-27	8/2009	72	1					8	2015-08-27	1	6.4	%	%
92502	Com6	Biocomposit	62	2015-08-27	8/2009	72	1					9	2015-08-27	1.011	6.9	4	4
99560	Com1	Biocomposit	75	2014-09-29	08/2011	37	1			DEXA	whole body	1	1st operation	1.214	2012.3	20.8	15962
99560	Com1	Biocomposit	75	2014-09-29	08/2011	37	1			DEXA	lumbar vertebrae	2	1st operation	1.068	97.4	19.9	880
99560	Com1	Biocomposit	75	2014-09-29	08/2011	37	1			DEXA	left tibia	3	1st Operation	1.385	92.6	5.2	35
99560	Com1	Biocomposit	75	2014-09-29	08/2011	37	1			DEXA	right tibia	4	1st Operation	1.379	94.3	4.1	30
99560	Com1	Biocomposit	75	2014-09-29	08/2011	37	1			DEXA	left femur	5	1st Operation	1.393	76.9	6.3	47
99560	Com1	Biocomposit	75	2014-09-29	08/2011	37	1			DEXA	right femur	6	1st Operation	1.329	73.3	4.9	45
99560	Com1	Biocomposit	75	2014-09-29	08/2011	37	1			DEXA	upper lumber vertebrae	7	1st Operation	1.29	51.6	13	124
99560	Com1	Biocomposit	75	2014-09-29	08/2011	37	1			DEXA	left femoral head	8	1st Operation	1.527	17.8	5.9	12
99560	Com1	Biocomposit	75	2014-09-29	08/2011	37	1			DEXA	right femoral head	9	1st Operation	1.301	16.4	7.1	20
99560	Com1	Biocomposit	75	2015-08-24	08/2011	48	1					1	2015-08-24	1.213	1929	17.1	11587
99560	Com1	Biocomposit	75	2015-08-24	08/2011	48	1					2	2015-08-24	1.049	92.9	12.6	575
99560	Com1	Biocomposit	75	2015-08-24	08/2011	48	1					3	2015-08-24	1.548	110.5	7	81
99560	Com1	Biocomposit	75	2015-08-24	08/2011	48	1					4	2015-08-24	1.355	87.9	4.8	44
99560	Com1	Biocomposit	75	2015-08-24	08/2011	48	1					5	2015-08-24	1.38	59.3	4.3	34
99560	Com1	Biocomposit	75	2015-08-24	08/2011	48	1					6	2015-08-24	1.191	58.6	4	33
99560	Com1	Biocomposit	75	2015-08-24	08/2011	48	1					7	2015-08-24	1.167	59.3	6.3	89
99560	Com1	Biocomposit	75	2015-08-24	08/2011	48	1					8	2015-08-24	1.303	13.4	24.5	49
99560	Com1	Biocomposit	75	2015-08-24	08/2011	48	1					9	2015-08-24	1.173	9.2	4	6
110378	HA10	HA	64	2014-10-14	11/2008	73	2	A+A		DEXA	whole body	1	1st operation	1.111	1702.9	6.6	4102
110378	HA10	HA	64	2014-10-14	11/2008	73	2	A+A		DEXA	lumbar vertebrae	2	1st operation	1.108	93.3	4	171
110378	HA10	HA	64	2014-10-14	11/2008	73	2	A+A		DEXA	left tibia	3	1st Operation	1.246	76.5	4	23
110378	HA10	HA	64	2014-10-14	11/2008	73	2	A+A		DEXA	right tibia	4	1st Operation	1.228	75.2	4	20
110378	HA10	HA	64	2014-10-14	11/2008	73	2	A+A		DEXA	left femur	5	1st Operation	1.116	48.9	4	25
110378	HA10	HA	64	2014-10-14	11/2008	73	2	A+A		DEXA	right femur	6	1st Operation	1.123	58.3	4	29
110378	HA10	HA	64	2014-10-14	11/2008	73	2	A+A		DEXA	upper lumber vertebrae	7	1st Operation	1.214	58.8	4	50
110378	HA10	HA	64	2014-10-14	11/2008	73	2	A+A		DEXA	left femoral head	8	1st Operation	1.21	8.9	4	4
110378	HA10	HA	64	2014-10-14	11/2008	73	2	A+A		DEXA	right femoral head	9	1st Operation	1.193	8.1	4	4
110378	HA10	HA	64	2015-08-28	11/2008	83	2	A+A				1	2015-08-28	1.108	1708	6.5	3822
110378	HA10	HA	64	2015-08-28	11/2008	83	2	A+A				2	2015-08-28	1.131	100.9	4	167
110378	HA10	HA	64	2015-08-28	11/2008	83	2	A+A				3	2015-08-28	1.294	84.4	4	27
110378	HA10	HA	64	2015-08-28	11/2008	83	2	A+A				4	2015-08-28	1.252	73.5	4	20
110378	HA10	HA	64	2015-08-28	11/2008	83	2	A+A				5	2015-08-28	1.134	50.7	4	28
110378	HA10	HA	64	2015-08-28	11/2008	83	2	A+A				6	2015-08-28	0.996	51.1	4	30
110378	HA10	HA	64	2015-08-28	11/2008	83	2	A+A				7	2015-08-28	1.367	60.3	4	40
110378	HA10	HA	64	2015-08-28	11/2008	83	2	A+A				8	2015-08-28	1.045	9.6	4	6
110378	HA10	HA	64	2015-08-28	11/2008	83	2	A+A				9	2015-08-28	0.872	7.6	4	6
272474	HA13	HA	66	2014-10-14	2011-10-01	36	2			DEXA	whole body	1	1st operation	1.045	1722.8	4.2	2865
272474	HA13	HA	66	2014-10-14	2011-10-01	36	2			DEXA	lumbar vertebrae	2	1st operation	0.88	75.6	4	178
272474	HA13	HA	66	2014-10-14	2011-10-01	36	2			DEXA	left tibia	3	1st Operation	1.118	76.3	4	20
272474	HA13	HA	66	2014-10-14	2011-10-01	36	2			DEXA	right tibia	4	1st Operation	1.088	71.2	4	22
272474	HA13	HA	66	2014-10-14	2011-10-01	36	2			DEXA	left femur	5	1st Operation	1.076	68.6	4	32
272474	HA13	HA	66	2014-10-14	2011-10-01	36	2			DEXA	right femur	6	1st Operation	1.065	70.8	4	34
272474	HA13	HA	66	2014-10-14	2011-10-01	36	2			DEXA	upper lumber vertebrae	7	1st Operation	0.967	41	4	48
272474	HA13	HA	66	2014-10-14	2011-10-01	36	2			DEXA	left femoral head	8	1st Operation	0.865	6	4	5
272474	HA13	HA	66	2014-10-14	2011-10-01	36	2			DEXA	right femoral head	9	1st Operation	0.875	7.9	4	6
272474	HA13	HA	66	2015-08-31	2011-10-01	46	2					1	2015-08-31	1.157	1893.6	11.3	9159
272474	HA13	HA	66	2015-08-31	2011-10-01	46	2					2	2015-08-31	1.068	85.6	7.5	353
272474	HA13	HA	66	2015-08-31	2011-10-01	46	2					3	2015-08-31	1.254	86.5	4	22
272474	HA13	HA	66	2015-08-31	2011-10-01	46	2					4	2015-08-31	1.203	82.4	4	25
272474	HA13	HA	66	2015-08-31	2011-10-01	46	2					5	2015-08-31	1.228	78.8	4	34
272474	HA13	HA	66	2015-08-31	2011-10-01	46	2					6	2015-08-31	1.129	71.2	4	32
272474	HA13	HA	66	2015-08-31	2011-10-01	46	2					7	2015-08-31	1.253	59.3	4	47
272474	HA13	HA	66	2015-08-31	2011-10-01	46	2					8	2015-08-31	1.26	7.2	4	4
272474	HA13	HA	66	2015-08-31	2011-10-01	46	2					9	2015-08-31	1.013	6.4	12	12
500069	HA8	HA	59	2014-10-10	10/2010	48	2	A+A		DEXA	whole body	1	1st operation	1.117	1914.1	8	5708
500069	HA8	HA	59	2014-10-10	10/2010	48	2	A+A		DEXA	lumbar vertebrae	2	1st operation	1.119	94.4	5.1	230
500069	HA8	HA	59	2014-10-10	10/2010	48	2	A+A		DEXA	left tibia	3	1st Operation	1.161	73.7	4	23
500069	HA8	HA	59	2014-10-10	10/2010	48	2	A+A		DEXA	right tibia	4	1st Operation	1.103	66.2	4	22
500069	HA8	HA	59	2014-10-10	10/2010	48	2	A+A		DEXA	left femur	5	1st Operation	1.087	61.9	4	35
500069	HA8	HA	59	2014-10-10	10/2010	48	2	A+A		DEXA	right femur	6	1st Operation	1.006	55.5	4	34
500069	HA8	HA	59	2014-10-10	10/2010	48	2	A+A		DEXA	upper lumber vertebrae	7	1st Operation	1.158	52.3	4.6	55
500069	HA8	HA	59	2014-10-10	10/2010	48	2	A+A		DEXA	left femoral head	8	1st Operation	0.998	11.1	4	8
500069	HA8	HA	59	2014-10-10	10/2010	48	2	A+A		DEXA	right femoral head	9	1st Operation	1.063	8.5	4.6	6
500069	HA8	HA	59	2015-08-28	10/2010	58	2	A+A				1	2015-08-28	1.09	1792.8	9.1	6848
500069	HA8	HA	59	2015-08-28	10/2010	58	2	A+A				2	2015-08-28	1.117	89.8	5.7	251
500069	HA8	HA	59	2015-08-28	10/2010	58	2	A+A				3	2015-08-28	1.063	66.9	4	28
500069	HA8	HA	59	2015-08-28	10/2010	58	2	A+A				4	2015-08-28	1.014	66.7	4.2	23
500069	HA8	HA	59	2015-08-28	10/2010	58	2	A+A				5	2015-08-28	0.991	54.5	4	34
500069	HA8	HA	59	2015-08-28	10/2010	58	2	A+A				6	2015-08-28	0.95	47.4	4	28
500069	HA8	HA	59	2015-08-28	10/2010	58	2	A+A				7	2015-08-28	1.311	46	7.6	65
500069	HA8	HA	59	2015-08-28	10/2010	58	2	A+A				8	2015-08-28	0.999	10.7	5.3	11
500069	HA8	HA	59	2015-08-28	10/2010	58	2	A+A				9	2015-08-28	0.843	7.2	4	8
1553604	Com11	Biocomposit	54	2014-10-27	10/2010	48	1			DEXA	whole body	1	1st operation	1.114	1842.3	4	2270
1553604	Com11	Biocomposit	54	2014-10-27	10/2010	48	1			DEXA	lumbar vertebrae	2	1st operation	1.068	76.3	4	176
1553604	Com11	Biocomposit	54	2014-10-27	10/2010	48	1			DEXA	left tibia	3	1st Operation	1.253	76.1	4	19
1553604	Com11	Biocomposit	54	2014-10-27	10/2010	48	1			DEXA	right tibia	4	1st Operation	1.235	77.1	4	19
1553604	Com11	Biocomposit	54	2014-10-27	10/2010	48	1			DEXA	left femur	5	1st Operation	1.251	66.7	4	24
1553604	Com11	Biocomposit	54	2014-10-27	10/2010	48	1			DEXA	right femur	6	1st Operation	1.141	54.2	4	20
1553604	Com11	Biocomposit	54	2014-10-27	10/2010	48	1			DEXA	upper lumber vertebrae	7	1st Operation	1.116	46.2	4.6	50
1553604	Com11	Biocomposit	54	2014-10-27	10/2010	48	1			DEXA	left femoral head	8	1st Operation	1.433	4.9	4	2
1553604	Com11	Biocomposit	54	2014-10-27	10/2010	48	1			DEXA	right femoral head	9	1st Operation	0.931	4.1	4	2
1553604	Com11	Biocomposit	54	2015-09-02	10/2010	59	1					1	2015-09-02	1.13	1751.6	4.7	2553
1553604	Com11	Biocomposit	54	2015-09-02	10/2010	59	1					2	2015-09-02	1.081	81.7	4	177
1553604	Com11	Biocomposit	54	2015-09-02	10/2010	59	1					3	2015-09-02	1.272	76.3	4	21
1553604	Com11	Biocomposit	54	2015-09-02	10/2010	59	1					4	2015-09-02	1.25	73.6	4	19
1553604	Com11	Biocomposit	54	2015-09-02	10/2010	59	1					5	2015-09-02	1.267	63.2	4	24
1553604	Com11	Biocomposit	54	2015-09-02	10/2010	59	1					6	2015-09-02	1.149	54.9	4	22
1553604	Com11	Biocomposit	54	2015-09-02	10/2010	59	1					7	2015-09-02	1.162	45.4	4	45
1553604	Com11	Biocomposit	54	2015-09-02	10/2010	59	1					8	2015-09-02	1.448	9.9	4	4
1553604	Com11	Biocomposit	54	2015-09-02	10/2010	59	1					9	2015-09-02	1.151	7	4	3
982000142486729	HA12	HA	72	2014-10-14	2012-10-31	24	2	A+A		DEXA	whole body	1	1st operation	1.165	1749.5	15.1	11195
982000142486729	HA12	HA	72	2014-10-14	2012-10-31	24	2	A+A		DEXA	lumbar vertebrae	2	1st operation	1.081	86.5	12.5	544
982000142486729	HA12	HA	72	2014-10-14	2012-10-31	24	2	A+A		DEXA	left tibia	3	1st Operation	1.255	82.6	4	25
982000142486729	HA12	HA	72	2014-10-14	2012-10-31	24	2	A+A		DEXA	right tibia	4	1st Operation	1.227	82.4	4.5	31
982000142486729	HA12	HA	72	2014-10-14	2012-10-31	24	2	A+A		DEXA	left femur	5	1st Operation	1.116	66.5	4
982000142486729	HA12	HA	72	2014-10-14	2012-10-31	24	2	A+A		DEXA	right femur	6	1st Operation	1.034	56.2	4.1	34
982000142486729	HA12	HA	72	2014-10-14	2012-10-31	24	2	A+A		DEXA	upper lumber vertebrae	7	1st Operation	1.207	51.7	8.3	89
982000142486729	HA12	HA	72	2014-10-14	2012-10-31	24	2	A+A		DEXA	left femoral head	8	1st Operation	1.218	6.2	4.1	4
982000142486729	HA12	HA	72	2014-10-14	2012-10-31	24	2	A+A		DEXA	right femoral head	9	1st Operation	1.118	5.9	4	4
982000142486729	HA12	HA	72	2015-09-01	2012-10-31	35	2	A+A				1	2015-09-01	1.226	1864.6	17.9	16642
982000142486729	HA12	HA	72	2015-09-01	2012-10-31	35	2	A+A				2	2015-09-01	1.067	81.9	15.3	765
982000142486729	HA12	HA	72	2015-09-01	2012-10-31	35	2	A+A				3	2015-09-01	1.31	91.7	4.6	36
982000142486729	HA12	HA	72	2015-09-01	2012-10-31	35	2	A+A				4	2015-09-01	1.323	87.5	8.3	61
982000142486729	HA12	HA	72	2015-09-01	2012-10-31	35	2	A+A				5	2015-09-01	1.139	57.2	4.9	44
982000142486729	HA12	HA	72	2015-09-01	2012-10-31	35	2	A+A				6	2015-09-01	1.161	72.2	6.4	65
982000142486729	HA12	HA	72	2015-09-01	2012-10-31	35	2	A+A				7	2015-09-01	1.12	43.7	9.6	113
982000142486729	HA12	HA	72	2015-09-01	2012-10-31	35	2	A+A				8	2015-09-01	0.955	7	4	6
982000142486729	HA12	HA	72	2015-09-01	2012-10-31	35	2	A+A				9	2015-09-01	0.914	7.8	4.2	8
.0170788	Com12	Biocomposit	72	2014-10-27	2011-10-01	36	1			DEXA	whole body	1	1st operation	1.236	1978.8	18.7	13670
.0170788	Com12	Biocomposit	72	2014-10-27	2011-10-01	36	1			DEXA	lumbar vertebrae	2	1st operation	1.118	99.2	12.5	538
.0170788	Com12	Biocomposit	72	2014-10-27	2011-10-01	36	1			DEXA	left tibia	3	1st Operation	1.202	79	4.3	27
.0170788	Com12	Biocomposit	72	2014-10-27	2011-10-01	36	1			DEXA	right tibia	4	1st Operation	1.231	78.1	4.3	27
.0170788	Com12	Biocomposit	72	2014-10-27	2011-10-01	36	1			DEXA	left femur	5	1st Operation	1.315	56.8	5.1	33
.0170788	Com12	Biocomposit	72	2014-10-27	2011-10-01	36	1			DEXA	right femur	6	1st Operation	1.242	54.1	4.2	27
.0170788	Com12	Biocomposit	72	2014-10-27	2011-10-01	36	1			DEXA	upper lumber vertebrae	7	1st Operation	1.177	69.3	10.3	151
.0170788	Com12	Biocomposit	72	2014-10-27	2011-10-01	36	1			DEXA	left femoral head	8	1st Operation	1.289	9.3	4.5	5
.0170788	Com12	Biocomposit	72	2014-10-27	2011-10-01	36	1			DEXA	right femoral head	9	1st Operation	1.159	8.5	4.5	6
.0170788	Com12	Biocomposit	72	2015-09-01	2011-10-01	47	1					1	2015-09-01	1.257	1834.3	18.6	15154
.0170788	Com12	Biocomposit	72	2015-09-01	2011-10-01	47	1					2	2015-09-01	1.165	94.6	18.3	937
.0170788	Com12	Biocomposit	72	2015-09-01	2011-10-01	47	1					3	2015-09-01	1.495	93.1	4.4	29
.0170788	Com12	Biocomposit	72	2015-09-01	2011-10-01	47	1					4	2015-09-01	1.397	88.1	5.1	34
.0170788	Com12	Biocomposit	72	2015-09-01	2011-10-01	47	1					5	2015-09-01	1.36	71	7.5	66
.0170788	Com12	Biocomposit	72	2015-09-01	2011-10-01	47	1					6	2015-09-01	1.282	67	6.6	63
.0170788	Com12	Biocomposit	72	2015-09-01	2011-10-01	47	1					7	2015-09-01	1.361	57.5	16.6	186
.0170788	Com12	Biocomposit	72	2015-09-01	2011-10-01	47	1					8	2015-09-01	1.567	10.9	5.3	8
.0170788	Com12	Biocomposit	72	2015-09-01	2011-10-01	47	1					9	2015-09-01	1.589	9.6	4.1	5
.0170788/14	Com13	Biocomposit	77.5	2014-10-27	2011-10-01	36	1			DEXA	whole body	1	1st operation	1.213	1916.4	20	15973
.0170788/14	Com13	Biocomposit	77.5	2014-10-27	2011-10-01	36	1			DEXA	lumbar vertebrae	2	1st operation	1.004	89.9	17.3	794
.0170788/14	Com13	Biocomposit	77.5	2014-10-27	2011-10-01	36	1			DEXA	left tibia	3	1st Operation	1.31	88.8	4.8	33
.0170788/14	Com13	Biocomposit	77.5	2014-10-27	2011-10-01	36	1			DEXA	right tibia	4	1st Operation	1.407	91.1	4	28
.0170788/14	Com13	Biocomposit	77.5	2014-10-27	2011-10-01	36	1			DEXA	left femur	5	1st Operation	1.306	52.5	4.2	26
.0170788/14	Com13	Biocomposit	77.5	2014-10-27	2011-10-01	36	1			DEXA	right femur	6	1st Operation	1.268	57.2	5.6	42
.0170788/14	Com13	Biocomposit	77.5	2014-10-27	2011-10-01	36	1			DEXA	upper lumber vertebrae	7	1st Operation	1.194	54.9	13.1	148
.0170788/14	Com13	Biocomposit	77.5	2014-10-27	2011-10-01	36	1			DEXA	left femoral head	8	1st Operation	1.382	7.7	5.1	6
.0170788/14	Com13	Biocomposit	77.5	2014-10-27	2011-10-01	36	1			DEXA	right femoral head	9	1st Operation	1.187	6.9	7.3	9
.0170788/14	Com13	Biocomposit	77.5	2015-09-02	2011-10-01	47	1					1	2015-09-02	1.251	1842	17.9	13912
.0170788/14	Com13	Biocomposit	77.5	2015-09-02	2011-10-01	47	1					2	2015-09-02	1.079	83.2	13.7	675
.0170788/14	Com13	Biocomposit	77.5	2015-09-02	2011-10-01	47	1					3	2015-09-02	1.289	82.9	4	27
.0170788/14	Com13	Biocomposit	77.5	2015-09-02	2011-10-01	47	1					4	2015-09-02	1.272	82.3	4.1	24
.0170788/14	Com13	Biocomposit	77.5	2015-09-02	2011-10-01	47	1					5	2015-09-02	1.474	69	5	41
.0170788/14	Com13	Biocomposit	77.5	2015-09-02	2011-10-01	47	1					6	2015-09-02	1.18	70	5.6	48
.0170788/14	Com13	Biocomposit	77.5	2015-09-02	2011-10-01	47	1					7	2015-09-02	1.152	48.6	8	98
.0170788/14	Com13	Biocomposit	77.5	2015-09-02	2011-10-01	47	1					8	2015-09-02	1.574	14.5	6.3	10
.0170788/14	Com13	Biocomposit	77.5	2015-09-02	2011-10-01	47	1					9	2015-09-02	1.383	9.5	12.5	16
12 /81250	HA14	HA	65	2014-10-15	10/2008	72	2		81250 (gelbe Marke)	DEXA	whole body	1	1st operation	1.105	1881	4.1	2344
12 /81250	HA14	HA	65	2014-10-15	10/2008	72	2		81250 (gelbe Marke)	DEXA	lumbar vertebrae	2	1st operation	0.934	80	4	170
12 /81250	HA14	HA	65	2014-10-15	10/2008	72	2		81250 (gelbe Marke)	DEXA	left tibia	3	1st Operation	1.257	80	4	18
12 /81250	HA14	HA	65	2014-10-15	10/2008	72	2		81250 (gelbe Marke)	DEXA	right tibia	4	1st Operation	1.198	77	4	21
12 /81250	HA14	HA	65	2014-10-15	10/2008	72	2		81250 (gelbe Marke)	DEXA	left femur	5	1st Operation	1.24	71	4	22
12 /81250	HA14	HA	65	2014-10-15	10/2008	72	2		81250 (gelbe Marke)	DEXA	right femur	6	1st Operation	1.178	71	4	26
12 /81250	HA14	HA	65	2014-10-15	10/2008	72	2		81250 (gelbe Marke)	DEXA	upper lumber vertebrae	7	1st Operation	1.04	44	4	44
12 /81250	HA14	HA	65	2014-10-15	10/2008	72	2		81250 (gelbe Marke)	DEXA	left femoral head	8	1st Operation	1.059	7	%	%
12 /81250	HA14	HA	65	2014-10-15	10/2008	72	2		81250 (gelbe Marke)	DEXA	right femoral head	9	1st Operation	1.019	8	4	4
12 /81250	HA14	HA	65	2015-09-01	10/2008	83	2		81250 (gelbe Marke)			1	2015-09-01	1.115	1866	4	2443
12 /81250	HA14	HA	65	2015-09-01	10/2008	83	2		81250 (gelbe Marke)			2	2015-09-01	1.008	83	4	173
12 /81250	HA14	HA	65	2015-09-01	10/2008	83	2		81250 (gelbe Marke)			3	2015-09-01	1.21	78	4	22
12 /81250	HA14	HA	65	2015-09-01	10/2008	83	2		81250 (gelbe Marke)			4	2015-09-01	1.2	77	4	23
12 /81250	HA14	HA	65	2015-09-01	10/2008	83	2		81250 (gelbe Marke)			5	2015-09-01	1.315	65	4	23
12 /81250	HA14	HA	65	2015-09-01	10/2008	83	2		81250 (gelbe Marke)			6	2015-09-01	1.106	58	4	23
12 /81250	HA14	HA	65	2015-09-01	10/2008	83	2		81250 (gelbe Marke)			7	2015-09-01	1.129	43	4	39
12 /81250	HA14	HA	65	2015-09-01	10/2008	83	2		81250 (gelbe Marke)			8	2015-09-01	1.406	12	4	5
12 /81250	HA14	HA	65	2015-09-01	10/2008	83	2		81250 (gelbe Marke)			9	2015-09-01	1.013	8	4	5
6/0082571	Com9	Biocomposit	57	2014-10-15	10/2009	5	1		82571	DEXA	whole body	1	1st operation	1.091	1939.9	4.1	2421
6/0082571	Com9	Biocomposit	57	2014-10-15	10/2009	5	1		82571	DEXA	lumbar vertebrae	2	1st operation	0.934	76.6	4	179
6/0082571	Com9	Biocomposit	57	2014-10-15	10/2009	5	1		82571	DEXA	left tibia	3	1st Operation	1.225	82.4	4	22
6/0082571	Com9	Biocomposit	57	2014-10-15	10/2009	5	1		82571	DEXA	right tibia	4	1st Operation	1.18	80.9	4	19
6/0082571	Com9	Biocomposit	57	2014-10-15	10/2009	5	1		82571	DEXA	left femur	5	1st Operation	1.336	73.2	4	24
6/0082571	Com9	Biocomposit	57	2014-10-15	10/2009	5	1		82571	DEXA	right femur	6	1st Operation	1.294	63	4	22
6/0082571	Com9	Biocomposit	57	2014-10-15	10/2009	5	1		82571	DEXA	upper lumber vertebrae	7	1st Operation	1.001	43.7	4	50
6/0082571	Com9	Biocomposit	57	2014-10-15	10/2009	5	1		82571	DEXA	left femoral head	8	1st Operation	1.113	8.9	4	6
6/0082571	Com9	Biocomposit	57	2014-10-15	10/2009	5	1		82571	DEXA	right femoral head	9	1st Operation	1.124	8.6	%	%
81250/009	Com5	Biocomposit	59	2014-10-09	2007-09-01	85	1			DEXA	whole body	1	1st operation	1.181	2048.8	4.1	2554
81250/009	Com5	Biocomposit	59	2014-10-09	2007-09-01	85	1			DEXA	lumbar vertebrae	2	1st operation	1.191	110.8	4	165
81250/009	Com5	Biocomposit	59	2014-10-09	2007-09-01	85	1			DEXA	left tibia	3	1st Operation	1.323	84.6	4	22
81250/009	Com5	Biocomposit	59	2014-10-09	2007-09-01	85	1			DEXA	right tibia	4	1st Operation	1.277	83	4	22
81250/009	Com5	Biocomposit	59	2014-10-09	2007-09-01	85	1			DEXA	left femur	5	1st Operation	1.355	85.3	4	27
81250/009	Com5	Biocomposit	59	2014-10-09	2007-09-01	85	1			DEXA	right femur	6	1st Operation	1.28	64.6	4	23
81250/009	Com5	Biocomposit	59	2014-10-09	2007-09-01	85	1			DEXA	upper lumber vertebrae	7	1st Operation	1.437	59.5	4	37
81250/009	Com5	Biocomposit	59	2014-10-09	2007-09-01	85	1			DEXA	left femoral head	8	1st Operation	1.749	10.6	%	%
81250/009	Com5	Biocomposit	59	2014-10-09	2007-09-01	85	1			DEXA	right femoral head	9	1st Operation	1.501	9.4	4	3
81250/009	Com5	Biocomposit	59	2015-08-26	2007-09-01	95	1					1	2015-08-26	1.27	2109.9	9.4	6526
81250/009	Com5	Biocomposit	59	2015-08-26	2007-09-01	95	1					2	2015-08-26	1.226	104.1	5.7	265
81250/009	Com5	Biocomposit	59	2015-08-26	2007-09-01	95	1					3	2015-08-26	1.4	90.5	4	26
81250/009	Com5	Biocomposit	59	2015-08-26	2007-09-01	95	1					4	2015-08-26	1.334	87.7	4	24
81250/009	Com5	Biocomposit	59	2015-08-26	2007-09-01	95	1					5	2015-08-26	1.445	77.4	4	30
81250/009	Com5	Biocomposit	59	2015-08-26	2007-09-01	95	1					6	2015-08-26	1.32	74.5	4	30
81250/009	Com5	Biocomposit	59	2015-08-26	2007-09-01	95	1					7	2015-08-26	1.318	60	6.4	75
81250/009	Com5	Biocomposit	59	2015-08-26	2007-09-01	95	1					8	2015-08-26	1.722	12.7	4	4
81250/009	Com5	Biocomposit	59	2015-08-26	2007-09-01	95	1					9	2015-08-26	1.445	11.3	4	4
T1
Ohrmarke	No.	Type	Gewicht	1.Messung	Geburtsdatum	Alter (Monate)	Group	Categorie	Bemerkung	Method	Area	Area_code	Time	BMD	BMC	Gewebe(%Fett)	Fett(g)
Ear tag		type	wight	1. Measurement	birth	age (month)	group	category	remarks	method	area	area code	time	BMD	BMC	tissue (%fat)	fat (g)
3		OD7	79		?	84				DXA	upper lumber vertebrae	7	2012-10-04	1.263	54.6	7	78
3		OD7	79			84				DXA	left femoral head	8	2012-10-04	1.252	8.4	4	5
3		OD7	79			84				DXA	right femoral head	9	2012-10-04	1.231	7.1	4	4
3		OD7	79			84				DXA	whole body	10	2012-10-04	1.127	1804.6	11.8	9354
5		O7	63			72				DXA	upper lumber vertebrae	7	2012-10-15	1.085	40.2	4	38
5		O7	63			72				DXA	left femoral head	8	2012-10-15	1.137	8.3	4.8	6
5		O7	63			72				DXA	right femoral head	9	2012-10-15	0.967	7.3	4	5
5		O7	63			72				DXA	whole body	10	2012-10-15	1.076	1454.5	9.5	6174
6		ODS6	60			84				DXA	upper lumber vertebrae	7	2012-10-05	1.071	44.6	4.1	42
6		ODS6	60			84				DXA	left femoral head	8	2012-10-05	1.244	9.7	8	10
6		ODS6	60			84				DXA	right femoral head	9	2012-10-05	1.013	8.6	9.2	13
6		ODS6	60			84				DXA	whole body	10	2012-10-05	1.023	1361.3	12.3	7591
32		K8	70			108				DXA	upper lumber vertebrae	7	2012-10-16	1.356	55.2	4.1	39
32		K8	70			108				DXA	left femoral head	8	2012-10-16	1.239	10	13.9	20
32		K8	70			108				DXA	right femoral head	9	2012-10-16	1.66	11.2	4	5
32		K8	70			108				DXA	whole body	10	2012-10-16	1.221	1812	16.2	11362
32		K8	70			111						7	2013-02-05	1.221	57.1	6	72
32		K8	70			111						8	2013-02-05	1.125	9	4	5
32		K8	70			111						9	2013-02-05	1.615	10.8	4.8	6
32		K8	70			111						10	2013-02-05	1.192	1748.1	10.6	7373
32		K8	70			116						7	2013-07-11	1.208	54.4	7.3	83
32		K8	70			116						8	2013-07-11	1.039	9.9	5	7
32		K8	70			116						9	2013-07-11	1.23	10.3	4	5
32		K8	70			116						10	2013-07-11	1.141	1766.7	6.9	4184
46		ODS7	60			108				DXA	upper lumber vertebrae	7	2012-10-05	1.453	67.2	15.9	180
46		ODS7	60			108				DXA	left femoral head	8	2012-10-05	1.716	9.4	4	3
46		ODS7	60			108				DXA	right femoral head	9	2012-10-05	1.457	7.6	6.4	4
46		ODS7	60			108				DXA	whole body	10	2012-10-05	1.243	1935.2	12.1	7255
46		ODS7	60			111						7	2013-02-05	1.343	77.3	12.1	187
46		ODS7	60			111						8	2013-02-05	0.947	7.8	18.7	24
46		ODS7	60			111						9	2013-02-05	1.077	7.9	4.9	5
46		ODS7	60			111						10	2013-02-05	1.169	2004.7	15.1	12764
46		ODS7	60			116						7	2013-07-08	1.347	69.4	11.7	162
46		ODS7	60			116						8	2013-07-08	0.918	9.3	15.9	25
46		ODS7	60			116						9	2013-07-08	1.037	9	%	%
46		ODS7	60			116						10	2013-07-08	1.167	2031.3	17.1	14409
48689		K7	77			84				DXA	upper lumber vertebrae	7	2012-10-16	1.256	49.7	10.2	104
48689		K7	77			84				DXA	left femoral head	8	2012-10-16	0.911	5.7	%	%
48689		K7	77			84				DXA	right femoral head	9	2012-10-16	1.02	5.2	4	3
48689		K7	77			84				DXA	whole body	10	2012-10-16	1.099	1781.3	10.8	8457
55500		K4	52			60				DXA	upper lumber vertebrae	7	2012-10-16	1.095	30.9	4	26
55500		K4	52			60				DXA	left femoral head	8	2012-10-16	1.267	6	4	3
55500		K4	52			60				DXA	right femoral head	9	2012-10-16	1.239	4.4	4	2
55500		K4	52			60				DXA	whole body	10	2012-10-16	1.014	1210.6	5.5	2935
55500		K4	52			63						7	2013-02-05	1.166	32.2	4.3	27
55500		K4	52			63						8	2013-02-05	1.426	9.9	4	4
55500		K4	52			63						9	2013-02-05	1.351	9.7	4	5
55500		K4	52			63						10	2013-02-05	1.084	1297.8	10	5716
55500		K4	52			68						7	2013-07-04	1.14	30.5	4.5	30
55500		K4	52			68						8	2013-07-04	1.17	7.5	13.1	13
55500		K4	52			68						9	2013-07-04	1.409	8.7	4	4
55500		K4	52			68						10	2013-07-04	1.139	1364.9	17.4	10427
68473		OD8	56			84				DXA	upper lumber vertebrae	7	2012-10-04	1.145	44.2	4	38
68473		OD8	56			84				DXA	left femoral head	8	2012-10-04	1.477	7.2	4	3
68473		OD8	56			84				DXA	right femoral head	9	2012-10-04	1.26	9.5	4	4
68473		OD8	56			84				DXA	whole body	10	2012-10-04	1.071	1469.5	4.4	2622
68483		OD1	47			36				DXA	upper lumber vertebrae	7	2012-10-02	1.04	32	4	27
68483		OD1	47			36				DXA	left femoral head	8	2012-10-02	1.088	4.7	4	3
68483		OD1	47			36				DXA	right femoral head	9	2012-10-02	1.181	5	4	2
68483		OD1	47			36				DXA	whole body	10	2012-10-02	1.018	1186.1	7	3350
68484		O1	56			36				DXA	upper lumber vertebrae	7	2012-10-02	1.203	37.6	9.7	77
68484		O1	56			36				DXA	left femoral head	8	2012-10-02	1.087	7.5	4	4
68484		O1	56			36				DXA	right femoral head	9	2012-10-02	1.412	9.7	4	4
68484		O1	56			36				DXA	whole body	10	2012-10-02	1.136	1398.6	15.2	8592
68488		OD3	54			48				DXA	upper lumber vertebrae	7	2012-10-04	0.977	30.4	5	34
68488		OD3	54			48				DXA	left femoral head	8	2012-10-04	0.951	6.1	4	3
68488		OD3	54			48				DXA	right femoral head	9	2012-10-04	1.08	5.7	4.1	3
68488		OD3	54			48				DXA	whole body	10	2012-10-04	0.982	1152.1	16.3	8911
68489		K1	58			36				DXA	upper lumber vertebrae	7	2012-10-16	0.975	30.2	4	32
68489		K1	58			36				DXA	left femoral head	8	2012-10-16	1.045	6.3	5.9	5
68489		K1	58			36				DXA	right femoral head	9	2012-10-16	0.969	4.8	4	4
68489		K1	58			36				DXA	whole body	10	2012-10-16	1.024	1150.4	7.6	4516
68489		K1	58			39						7	2013-02-05	0.95	24.7	4.1	30
68489		K1	58			39						8	2013-02-05	1.116	8.2	4	5
68489		K1	58			39						9	2013-02-05	1.003	8.3	4	7
68489		K1	58			39						10	2013-02-05	1.046	1215.7	10	6193
68489		K1	58			44						7	2013-07-11	1.166	34.5	22.1	145
68489		K1	58			44						8	2013-07-11	1.147	7.7	4.7	5
68489		K1	58			44						9	2013-07-11	0.972	6.8	5.1	6
68489		K1	58			44						10	2013-07-11	1.077	1346	16	10459
83186		OD2	55			96				DXA	upper lumber vertebrae	7	2012-10-15	1.175	40.9	4	33
83186		OD2	55			96				DXA	left femoral head	8	2012-10-15	1.241	10.1	4	4
83186		OD2	55			96				DXA	right femoral head	9	2012-10-15	1.347	7.1	4	3
83186		OD2	55			96				DXA	whole body	10	2012-10-15	1.088	1392.2	7.1	4063
83188		O5	58			72				DXA	upper lumber vertebrae	7	2012-10-02	1.304	51.8	4	40
83188		O5	58			72				DXA	left femoral head	8	2012-10-02	1.01	10.8	4	7
83188		O5	58			72				DXA	right femoral head	9	2012-10-02	1.408	9	4	4
83188		O5	58			72				DXA	whole body	10	2012-10-02	1.074	1372.6	4.5	2.487
83190		ODS4	67			60				DXA	upper lumber vertebrae	7	2012-10-05	1.304	52.5	4	39
83190		ODS4	67			60				DXA	left femoral head	8	2012-10-05	1.613	10.3	4	4
83190		ODS4	67			60				DXA	right femoral head	9	2012-10-05	1.169	7.9	7.9	7
83190		ODS4	67			60				DXA	whole body	10	2012-10-05	1.165	1716.2	6.1	4206
83193		K3	54			48				DXA	upper lumber vertebrae	7	2012-10-16	1.176	41.7	4	36
83193		K3	54			48				DXA	left femoral head	8	2012-10-16	1.345	8	4	3
83193		K3	54			48				DXA	right femoral head	9	2012-10-16	1.281	9	4	4
83193		K3	54			48				DXA	whole body	10	2012-10-16	1.067	1452.1	4	2230
83193		K3	54			51						7	2013-02-05	1.233	42.5	4.8	43
83193		K3	54			51						8	2013-02-05	1.221	10.1	7.3	8
83193		K3	54			51						9	2013-02-05	1.133	8.9	4	5
83193		K3	54			51						10	2013-02-05	1.102	1545.6	5	2861
83193		K3	54			56						7	2013-07-03	1.358	48.7	5.8	51
83193		K3	54			56						8	2013-07-03	1.186	9.4	4	5
83193		K3	54			56						9	2013-07-03	1.307	9.5	4	4
83193		K3	54			56						10	2013-07-03	1.162	1570.9	13	7837
83195		ODS8	53			72				DXA	upper lumber vertebrae	7	2012-10-04	1.261	41.8	4.4	32
83195		ODS8	53			72				DXA	left femoral head	8	2012-10-04	0.871	6.1	4	5
83195		ODS8	53			72				DXA	right femoral head	9	2012-10-04	0.85	6.1	4	4
83195		ODS8	53			72				DXA	whole body	10	2012-10-04	0.993	1306	6.8	3650
83199		ODS1	61			36				DXA	upper lumber vertebrae	7	2012-10-04	1.299	47.6	7.1	62
83199		ODS1	61			36				DXA	left femoral head	8	2012-10-04	0.979	7.5	4	5
83199		ODS1	61			36				DXA	right femoral head	9	2012-10-04	1.088	8.3	4	5
83199		ODS1	61			36				DXA	whole body	10	2012-10-04	1.105	1435.3	10.1	6310
83201		ODS5	65			72				DXA	upper lumber vertebrae	7	2012-10-05	1.09	41.8	4	38
83201		ODS5	65			72				DXA	left femoral head	8	2012-10-05	1.187	4.8	4	2
83201		ODS5	65			72				DXA	right femoral head	9	2012-10-05	1.433	7.9	4	3
83201		ODS5	65			72				DXA	whole body	10	2012-10-05	1.107	1537.1	4.8	3220
83202		ODS3	61			48				DXA	upper lumber vertebrae	7	2012-10-05	1.219	45.9	4	34
83202		ODS3	61			48				DXA	left femoral head	8	2012-10-05	0.953	6.4	4	5
83202		ODS3	61			48				DXA	right femoral head	9	2012-10-05	1.087	6.5	4	4
83202		ODS3	61			48				DXA	whole body	10	2012-10-05	1.107	1654.1	5.7	3649
83205		O2	53			36				DXA	upper lumber vertebrae	7	2012-10-01	1.176	39	4	29
83205		O2	53			36				DXA	left femoral head	8	2012-10-01	1.255	8.5	4	4
83205		O2	53			36				DXA	right femoral head	9	2012-10-01	1.055	9.9	4	7
83205		O2	53			36				DXA	whole body	10	2012-10-01	1.112	1382.3	6.6	3427
83206		O3	56			48				DXA	upper lumber vertebrae	7	2012-10-01	1.3	43.3	10.6	89
83206		O3	56			48				DXA	left femoral head	8	2012-10-01	1.353	9.4	5.3	7
83206		O3	56			48				DXA	right femoral head	9	2012-10-01	1.281	9.7	7.3	12
83206		O3	56			48				DXA	whole body	10	2012-10-01	1.191	1481.6	11.2	6210
83207		K2	54			36				DXA	upper lumber vertebrae	7	2012-10-16	0.998	33.2	4	30
83207		K2	54			36				DXA	left femoral head	8	2012-10-16	1.062	9.5	5.3	7
83207		K2	54			36				DXA	right femoral head	9	2012-10-16	1.132	9.3	5	6
83207		K2	54			36				DXA	whole body	10	2012-10-16	1.037	1458.7	6.1	3475
83207		K2	54			39						7	2013-02-05	1.051	37.4	4	36
83207		K2	54			39						8	2013-02-05	0.952	10.6	4	7
83207		K2	54			39						9	2013-02-05	1.087	9.1	4	5
83207		K2	54			39						10	2013-02-05	1.043	1517.2	6.5	3745
83207		K2	54			44						7	2013-07-01	1.019	35.5	4.6	43
83207		K2	54			44						8	2013-07-01	1.178	9	8.5	12
83207		K2	54			44						9	2013-07-01	1.016	8.8	9.3	13
83207		K2	54			44						10	2013-07-01	1.099	1619.4	10.9	7394
83209		OD5	59			60				DXA	upper lumber vertebrae	7	2012-10-02	1.328	52	4	38
83209		OD5	59			60				DXA	left femoral head	8	2012-10-02	1.171	5.7	5.9	4
83209		OD5	59			60				DXA	right femoral head	9	2012-10-02	1.173	8.1	4	5
83209		OD5	59			60				DXA	whole body	10	2012-10-02	1.093	1646.7	4.7	2808
83210		K6	61			72				DXA	upper lumber vertebrae	7	2012-10-16	1.117	49	5.9	66
83210		K6	61			72				DXA	left femoral head	8	2012-10-16	1.122	6.8	4	3
83210		K6	61			72				DXA	right femoral head	9	2012-10-16	1.276	7.7	4.8	5
83210		K6	61			72				DXA	whole body	10	2012-10-16	1.083	1406.9	12.5	7862
83210		K6	61			75						7	2013-02-05	1.185	46.8	7.8	77
83210		K6	61			75						8	2013-02-05	1.222	8.4	4	5
83210		K6	61			75						9	2013-02-05	1.01	7	4	4
83210		K6	61			75						10	2013-02-05	1.123	1455.6	14.1	9583
83210		K6	61			80						7	2013-07-10	1.154	48.8	8.3	93
83210		K6	61			80						8	2013-07-10	1.38	11.4	4.6	6
83210		K6	61			80						9	2013-07-10	1.168	8.7	4.7	5
83210		K6	61			80						10	2013-07-10	1.162	1534.2	18.8	13015
83211		O4	60			60				DXA	upper lumber vertebrae	7	2012-10-01	1.075	43.5	4	42
83211		O4	60			60				DXA	left femoral head	8	2012-10-01	1.07	7.4	4	4
83211		O4	60			60				DXA	right femoral head	9	2012-10-01	0.913	9.9	4	7
83211		O4	60			60				DXA	whole body	10	2012-10-01	1.026	1499.9	4	2312
83212		ODS2	41			36				DXA	upper lumber vertebrae	7	2012-10-04	1.183	34.6	4.1	26
83212		ODS2	41			36				DXA	left femoral head	8	2012-10-04	1.174	4.8	4	2
83212		ODS2	41			36				DXA	right femoral head	9	2012-10-04	1.306	4.7	4	3
83212		ODS2	41			36				DXA	whole body	10	2012-10-04	1.022	1154	8.7	3750
83214		OD4	69			48				DXA	upper lumber vertebrae	7	2012-10-15	1.225	54	4	45
83214		OD4	69			48				DXA	left femoral head	8	2012-10-15	1.577	9.6	4	4
83214		OD4	69			48				DXA	right femoral head	9	2012-10-15	1.596	9.5	4	3
83214		OD4	69			48				DXA	whole body	10	2012-10-15	1.088	1689.2	5.4	3629
94901		OD6	86			36				DXA	upper lumber vertebrae	7	2012-10-15	1.319	53	13.2	128
94901		OD6	86			36				DXA	left femoral head	8	2012-10-15	1.589	10	4.1	5
94901		OD6	86			36				DXA	right femoral head	9	2012-10-15	1.573	7.7	4.8	4
94901		OD6	86			36				DXA	whole body	10	2012-10-15	1.205	1901.3	18.6	16333
94902		K5	81			36				DXA	upper lumber vertebrae	7	2012-10-15	1.226	41.2	14.3	143
94902		K5	81			36				DXA	left femoral head	8	2012-10-15	1.283	14.7	11.1	26
94902		K5	81			36				DXA	right femoral head	9	2012-10-15	1.168	13.4	7.6	18
94902		K5	81			36				DXA	whole body	10	2012-10-15	1.204	1807.5	21.6	17626
94902		K5	81			39						7	2013-02-05	1.228	52.4	14.3	189
94902		K5	81			39						8	2013-02-05	1.246	8.6	5.9	8
94902		K5	81			39						9	2013-02-05	1.251	9	4	6
94902		K5	81			39						10	2013-02-05	1.171	1878.8	20.7	17850
94902		K5	81			44						7	2013-07-05	1.408	51.4	17.7	192
94902		K5	81			44						8	2013-07-05	1.361	9	11.4	17
94902		K5	81			44						9	2013-07-05	1.334	10	5.4	9
94902		K5	81			44						10	2013-07-05	1.229	1753.5	24	21457
0.170788		O6	74			108				DXA	upper lumber vertebrae	7	2012-10-02	1.352	57.3	6.7	70
0.170788		O6	74			108				DXA	left femoral head	8	2012-10-02	1.109	13.2	6.8	14
0.170788		O6	74			108				DXA	right femoral head	9	2012-10-02	1.128	9.4	4	6
0.170788		O6	74			108				DXA	whole body	10	2012-10-02	1.184	1781.2	14.8	10921
T2
Ohrmarke	No.	Type	Gewicht	1.Messung	Geburtsdatum	Alter (Monate)	Group	Categorie	Bemerkung	Method	Area	Area_code	Time	BMD	BMC	Gewebe(%Fett)	Fett(g)
Ear tag		type	wight	1. Measurement	birth	age (month)	group	category	remarks	method	area	area code	time	BMD	BMC	tissue (%fat)	fat (g)
26867		FD1	76	2014-04-10						DXA	whole body	1	2014-04-10	1.162	1566.4	15.2	11301
26867		FD1	76	2014-04-10						DXA	upper lumber vertebrae	2	2014-04-10	1.375	50.9	5.1	46
26867		FD1	76	2014-04-10						DXA	left femoral head	3	2014-04-10	1.431	14.6	4.5	8
26867		FD1	76	2014-04-10						DXA	right femoral head	4	2014-04-10	1.202	13.9	4.5	11
27078		FDK3	77	2014-04-10						DXA	whole body	1	2014-04-10	1.297	2416.8	6.3	4936
27078		FDK3	77	2014-04-10						DXA	upper lumber vertebrae	2	2014-04-10	1.682	53.3	%	%
27078		FDK3	77	2014-04-10						DXA	left femoral head	3	2014-04-10	1.207	12.3	4	7
27078		FDK3	77	2014-04-10						DXA	right femoral head	4	2014-04-10	1.296	13.4	4	9
27303		OVX2	102	2015-07-29	2008-04-18	87				DXA	whole body	1	2015-07-29	1.241	2424.5	19.3	20830
27303		OVX2	102	2015-07-29	2008-04-18	87				DXA	upper lumber vertebrae	2	2015-07-29	1.381	63.5	12.3	148
27303		OVX2	102	2015-07-29	2008-04-18	87				DXA	left femoral head	3	2015-07-29	1.262	14.3	7	18
27303		OVX2	102	2015-07-29	2008-04-18	87				DXA	right femoral head	4	2015-07-29	1.14	15.1	6.5	17
27475		OVX4	86.5	2015-07-29	2008-04-11	87				DXA	whole body	1	2015-07-29	1.219	2015.5	25.1	22857
27475		OVX4	86.5	2015-07-29	2008-04-11	87				DXA	upper lumber vertebrae	2	2015-07-29	1.301	54	23.2	242
27475		OVX4	86.5	2015-07-29	2008-04-11	87				DXA	left femoral head	3	2015-07-29	1.455	13	17.5	37
27475		OVX4	86.5	2015-07-29	2008-04-11	87				DXA	right femoral head	4	2015-07-29	1.274	14.2	13.8	29
27537		FD2	77	2014-04-10						DXA	whole body	1	2014-04-10	1.293	2341.4	13.7	10279
27537		FD2	77	2014-04-10						DXA	upper lumber vertebrae	2	2014-04-10	1.423	50	6.5	59
27537		FD2	77	2014-04-10						DXA	left femoral head	3	2014-04-10	1.604	17.2	4.7	8
27537		FD2	77	2014-04-10						DXA	right femoral head	4	2014-04-10	1.609	15.2	4	6
27547		FD_K5	88	2014-04-11						DXA	whole body	1	2014-04-11	1.172	2148.2	11.9	9501
27547		FD_K5	88	2014-04-11						DXA	upper lumber vertebrae	2	2014-04-11	1.358	55.9	5.4	53
27547		FD_K5	88	2014-04-11						DXA	left femoral head	3	2014-04-11	1.211	13.2	4	10
27547		FD_K5	88	2014-04-11						DXA	right femoral head	4	2014-04-11	1.313	18.3	4.4	10
27701		MK04	94	2015-07-15	2008-12-04	89				DXA	whole body	1	2015-07-15	1.29	2263.7	17	15968
27701		MK04	94	2015-07-15	2008-12-04	89				DXA	upper lumber vertebrae	2	2015-07-15	1.401	75	13.1	186
27701		MK04	94	2015-07-15	2008-12-04	89				DXA	left femoral head	3	2015-07-15	1.278	13.2	4.8	10
27701		MK04	94	2015-07-15	2008-12-04	89				DXA	right femoral head	4	2015-07-15	1.25	13.7	7.5	17
27732		SHAM	90	2015-10-29	2009-11-05	71				DXA	whole body	1	2015-10-29	1.303	2102.6	21	20641
27732		SHAM	90	2015-10-29	2009-11-05	71				DXA	upper lumber vertebrae	2	2015-10-29	1.178	55.7	15.5	216
27732		SHAM	90	2015-10-29	2009-11-05	71				DXA	left femoral head	3	2015-10-29	1.273	14.6	8.1	18
27732		SHAM	90	2015-10-29	2009-11-05	71				DXA	right femoral head	4	2015-10-29	1.555	18.7	8.2	21
27796		FD_K4	100	2014-04-11						DXA	whole body	1	2014-04-11	1.383	2968.8	30.8	33588
27796		FD_K4	100	2014-04-11						DXA	upper lumber vertebrae	2	2014-04-11	1.594	70.3	26.8	314
27796		FD_K4	100	2014-04-11						DXA	left femoral head	3	2014-04-11	1.767	20.4	21.4	54
27796		FD_K4	100	2014-04-11						DXA	right femoral head	4	2014-04-11	1.718	16.8	14.7	28
27832		FD_K6	82	2014-04-11						DXA	whole body	1	2014-04-11	1.28	2341.5	21	18701
27832		FD_K6	82	2014-04-11						DXA	upper lumber vertebrae	2	2014-04-11	1.499	69	17	192
27832		FD_K6	82	2014-04-11						DXA	left femoral head	3	2014-04-11	1.385	17.9	9.1	24
27832		FD_K6	82	2014-04-11						DXA	right femoral head	4	2014-04-11	1.167	14.9	12.5	38
27881		SHAM	101	2015-10-29	2009-01-13	81				DXA	whole body	1	2015-10-29	1.341	2854.7	17.5	17495
27881		SHAM	101	2015-10-29	2009-01-13	81				DXA	upper lumber vertebrae	2	2015-10-29	1.432	57.7	19.6	220
27881		SHAM	101	2015-10-29	2009-01-13	81				DXA	left femoral head	3	2015-10-29	1.069	14.2	7.7	21
27881		SHAM	101	2015-10-29	2009-01-13	81				DXA	right femoral head	4	2015-10-29	1.293	16.6	4.6	13
27995		OVX3	107	2015-10-27	2009-01-14	81				DXA	whole body	1	2015-10-27	1.227	1871.3	29.6	31978
27995		OVX3	107	2015-10-27	2009-01-14	81				DXA	upper lumber vertebrae	2	2015-10-27	1.309	45.2	17.2	166
27995		OVX3	107	2015-10-27	2009-01-14	81				DXA	left femoral head	3	2015-10-27	1.311	14.4	21.9	56
27995		OVX3	107	2015-10-27	2009-01-14	81				DXA	right femoral head	4	2015-10-27	1.399	13	16.7	38
27995(2!)		OVX3	102	2015-07-29	2009-01-14	78				DXA	whole body	1	2015-07-29	1.279	2333.9	28.2	30509
27995(2!)		OVX3	102	2015-07-29	2009-01-14	78				DXA	upper lumber vertebrae	2	2015-07-29	1.564	76	22.8	293
27995(2!)		OVX3	102	2015-07-29	2009-01-14	78				DXA	left femoral head	3	2015-07-29	1.474	15.8	16.6	43
27995(2!)		OVX3	102	2015-07-29	2009-01-14	78				DXA	right femoral head	4	2015-07-29	1.43	15.9	17.9	48
28124		SHAM	111	2015-10-29	2009-01-30	81				DXA	whole body	1	2015-10-29	1.264	2672.6	20.4	22540
28124		SHAM	111	2015-10-29	2009-01-30	81				DXA	upper lumber vertebrae	2	2015-10-29	1.449	64.8	19.6	233
28124		SHAM	111	2015-10-29	2009-01-30	81				DXA	left femoral head	3	2015-10-29	1.032	18.6	11.7	53
28124		SHAM	111	2015-10-29	2009-01-30	81				DXA	right femoral head	4	2015-10-29	1.113	20.4	8.2	38
28273		MK05	101	2015-07-15	2010-01-19	66				DXA	whole body	1	2015-07-15	1.264	2294.6	22.9	24192
28273		MK05	101	2015-07-15	2010-01-19	66				DXA	upper lumber vertebrae	2	2015-07-15	1.656	81.4	15	177
28273		MK05	101	2015-07-15	2010-01-19	66				DXA	left femoral head	3	2015-07-15	1.243	11.2	8.1	16
28273		MK05	101	2015-07-15	2010-01-19	66				DXA	right femoral head	4	2015-07-15	1.272	11.7	8.6	17
28273(2!)		MK05b	101	2015-07-15	2010-01-19	66				DXA	whole body	1	2015-07-15	1.242	2228.2	22.4	23371
28273(2!)		MK05b	101	2015-07-15	2010-01-19	66				DXA	upper lumber vertebrae	2	2015-07-15	1.677	65.7	13.6	126
28273(2!)		MK05b	101	2015-07-15	2010-01-19	66				DXA	left femoral head	3	2015-07-15	1.244	9.7	12.4	22
28273(2!)		MK05b	101	2015-07-15	2010-01-19	66				DXA	right femoral head	4	2015-07-15	1.399	13.3	5.4	12
207575		OVX5	94	2015-07-29	2011-01-04	54				DXA	whole body	1	2015-07-29	1.28	2349	19.9	19522
207575		OVX5	94	2015-07-29	2011-01-04	54				DXA	upper lumber vertebrae	2	2015-07-29	1.433	60.8	21.1	261
207575		OVX5	94	2015-07-29	2011-01-04	54				DXA	left femoral head	3	2015-07-29	1.271	13.4	15.1	35
207575		OVX5	94	2015-07-29	2011-01-04	54				DXA	right femoral head	4	2015-07-29	1.124	13.5	10.8	27
207575(2!)		OVX5	94	2015-10-27	2011-01-04	57				DXA	whole body	1	2015-10-27	1.19	1907.9	23.4	24173
207575(2!)		OVX5	94	2015-10-27	2011-01-04	57				DXA	upper lumber vertebrae	2	2015-10-27	1.229	57.1	12.6	167
207575(2!)		OVX5	94	2015-10-27	2011-01-04	57				DXA	left femoral head	3	2015-10-27	1.099	10.9	6.9	12
207575(2!)		OVX5	94	2015-10-27	2011-01-04	57				DXA	right femoral head	4	2015-10-27	1.019	12.1	12.9	32
275555		OVX1	98	2015-07-29	2008-12-16	79				DXA	whole body	1	2015-07-29	1.382	2973.2	21	21380
275555		OVX1	98	2015-07-29	2008-12-16	79				DXA	upper lumber vertebrae	2	2015-07-29	1.415	71.1	26.7	389
275555		OVX1	98	2015-07-29	2008-12-16	79				DXA	left femoral head	3	2015-07-29	1.539	20.7	15.7	47
275555		OVX1	98	2015-07-29	2008-12-16	79				DXA	right femoral head	4	2015-07-29	1.547	18.6	8.1	18
183500		OVX6	101	2015-07-29	2010-01-19	66				DXA	whole body	1	2015-07-29	1.366	2726.6	25.7	27458
183500		OVX6	101	2015-07-29	2010-01-19	66				DXA	upper lumber vertebrae	2	2015-07-29	1.494	73.1	21	291
183500		OVX6	101	2015-07-29	2010-01-19	66				DXA	left femoral head	3	2015-07-29	1.416	16.9	14.7	35
183500		OVX6	101	2015-07-29	2010-01-19	66				DXA	right femoral head	4	2015-07-29	1.379	17.9	10.5	30
OM_27132		MK06	101	2015-07-15	2008-01-04	90				DXA	whole body	1	2015-07-15	1.31	2667.4	16	16652
OM_27132		MK06	101	2015-07-15	2008-01-04	90				DXA	upper lumber vertebrae	2	2015-07-15	1.612	87.9	17.1	259
OM_27132		MK06	101	2015-07-15	2008-01-04	90				DXA	left femoral head	3	2015-07-15	1.494	12.1	5.1	7
OM_27132		MK06	101	2015-07-15	2008-01-04	90				DXA	right femoral head	4	2015-07-15	1.489	13.4	5.3	9

## Sheet: Sheet2
Operation day
Monday	Tuesday	Thursday	Friday	Monday	Tuesday	Wednesday	Monday
2014-10-06	2014-10-07	2014-10-09	2014-10-10	2014-10-13	2014-10-14	2014-10-15	2014-10-27
Markus Engelhardt
Thaqif El Khassawna
Laura Bockel

## Sheet: Codebook
Earmark ID				-
type					-
wight (kg)				kg
Date of Measurement		Date
Date of birth				Date
age (month)				month
group					the group to which the animal was randomly assigned
method				DXA measurement
area					of DXA measurement
area code				ROI				- see Table No. 2
time					time of DXA measurement
BMD					g/square cm			- see Table No. 3
BMC					g
Fat (%)					%
Fat (g)					g
Publication, transfer or use by third parties prior to publication of the manuscript is not permitted.
